# Supplementary material for: Zebrafish as a Model to Study the Role of Peroxisome Proliferating-Activated Receptors in Adipogenesis and Obesity
Source: Hindawi journal article supplement (doi:10.1155/2015/358029), 2015-01-01
Supplement: f1 [file 358029.f1.pdf]

## Supplemental data 1: Accession numbers for PPAR proteins

Table S1: All PPAR protein Accession numbers used for Protein alignment using Praline and Phylogentic tree (Geneious)

| PPAR  | Species             | Accession numbers                               |
|-------|---------------------|-------------------------------------------------|
| PPARA | Mouse               | <i>Mus musculus</i><br>NP_001106889.1           |
|       | Rat                 | <i>Rattus norvegicus</i><br>NP_037328.1         |
|       | Human               | <i>Homo sapiens</i><br>CAG33716.1               |
|       | Crab-eating macaque | <i>Macaca fascicularis</i><br>XP_005567059.1    |
|       | Rhesus macaque      | <i>Macaca mulatta</i><br>NP_001028201.1         |
|       | Chicken             | <i>Gallus gallus</i><br>NP_001001464.1          |
|       | African clawed frog | <i>Xenopus laevis</i><br>AAH79684.1             |
|       | Japanese medaka     | <i>Oryzias latipes</i><br>BAH58103.1            |
|       | Cow                 | <i>Bos taurus</i><br>NP_001029208.1             |
|       | Salmon              | <i>Salmo salar</i><br>NP_001117032.1            |
|       | Dog                 | <i>Canis lupus familiaris</i><br>NP_001003093.1 |
|       | Wild boar           | <i>Sus scrofa</i><br>NP_001037991.1             |
|       | Rainbow trout       | <i>Oncorhynchus mykiss</i><br>ADN92684.1        |
|       | Zebrafish a         | <i>Danio rerio</i><br>NP_001154805.1            |
|       | Zebrafish b         | NP_001096037.1                                  |
| PPARD | Mouse               | <i>Mus musculus</i><br>NP_035275.1              |
|       | Rat                 | <i>Rattus norvegicus</i><br>NP_037273.2         |
|       | Human               | <i>Homo sapiens</i><br>NP_001165289.1           |
|       | Crab-eating macaque | <i>Macaca fascicularis</i><br>XP_005553282.1    |
|       | Rhesus macaque      | <i>Macaca mulatta</i><br>AFI33297.1             |
|       | Chicken             | <i>Gallus gallus</i><br>NP_990059.1             |
|       | African clawed frog | <i>Xenopus laevis</i><br>NP_001081310.1         |
|       | Japanese medaka     | <i>Oryzias latipes</i><br>BAH58104.1            |
|       | Cow                 | <i>Bos taurus</i><br>NP_001077105.1             |
|       | Salmon              | <i>Salmo salar</i><br>AAK76399.1                |
|       | Dog                 | <i>Canis lupus familiaris</i><br>NP_001041567.1 |
|       | Wild boar           | <i>Sus scrofa</i><br>NP_999317.2                |
|       | Rainbow trout       | <i>Oncorhynchus mykiss</i><br>ADN92685.1        |
|       | Zebrafish a         | <i>Danio rerio</i><br>XP_005168343.1            |
|       | Zebrafish b         | NP_571543.1                                     |
| PPARG | Mouse 1             | <i>Mus musculus</i><br>NP_001120802.1           |
|       | Mouse 2             | NP_035276.2                                     |
|       | Rat 1               | <i>Rattus norvegicus</i><br>NP_037256.1         |
|       | Rat 2               | NP_001138838.1                                  |
|       | Human 1             | <i>Homo sapiens</i><br>NP_005028.4              |
|       | Human 2             | NP_056953.2                                     |
|       | Crab-eating macaque | <i>Macaca fascicularis</i><br>NP_001270028.1    |
|       | Rhesus macaque      | <i>Macaca mulatta</i><br>NP_001028032.1         |
|       | Chicken             | <i>Gallus gallus</i><br>NP_001001460.1          |
|       | African clawed frog | <i>Xenopus laevis</i><br>NP_001081312.1         |
|       | Japanese medaka     | <i>Oryzias latipes</i><br>NP_001158348.1        |
|       | Cow 1               | <i>Bos taurus</i><br>AAI16099.1                 |
|       | Cow 2               | NP_851367.1                                     |
|       | Salmon              | <i>Salmo salar</i><br>CAC95231.1                |
|       | Dog                 | <i>Canis lupus familiaris</i><br>NP_001019803.1 |
|       | Wild boar           | <i>Sus scrofa</i><br>NP_999544.1                |
|       | Rabbit              | <i>Oryctolagus cuniculus</i><br>NP_001075617.1  |
|       | Rainbow trout       | <i>Oncorhynchus mykiss</i><br>ADN92686.1        |
|       | Zebrafish           | <i>Danio rerio</i><br>NP_571542.1               |

## Supplemental data 2A: Protein alignment PPARA

|             |             |             |            |            |              |             |
|-------------|-------------|-------------|------------|------------|--------------|-------------|
|             |             | 10          | 20         | 30         | 40           | 50          |
| mmPPARA     | ----        | MVDTES      | PICPLSPLEA | DDLESPLSEE | FLQEMGNIQE   | ISQSIGEESS  |
| rnPPARA     | ----        | MVDTES      | PICPLSPLEA | DDLESPLSEE | FLQEMGNIQE   | ISQSLGEESS  |
| btPPARA     | ----        | MEMVDTES    | PIGFLSPLEA | DDLESPLSAD | FLQEMGTIQE   | ISQSIGEDSS  |
| clPPARA     | ----        | MVDTES      | PICPLSPLEA | DDLESPLSEE | FLQEMGNIQE   | ISQSIGEDSS  |
| ssPPARA     | ----        | MVDTES      | PICPLSPLEA | DDLESPLSEE | FLQEMGTIQE   | ISQSIGEDSS  |
| hsPPARA     | ----        | MVDTES      | PLCPLSPLEA | GDLESPLSEE | FLQEMGNIQE   | ISQSIGEDSS  |
| ggPPARA     | ----        | MVDTEN      | QLYPLTPLEE | DDIGSPLSGE | FLQDMENIQD   | ISQSLGDDSS  |
| xlPPARA     | ----        | MSTIMVDTNS  | ELCILTPLDE | DDLESPLSGE | FLQDIVDIQD   | ITQTIGDDGS  |
| macfPPARA   | ----        | MVDTES      | PLCPLSPLEA | GDLESPLSEE | FLQEMGNIQE   | ISQSIGEDSS  |
| macmPPARA   | ----        | MVDTES      | PLCPLSPLEA | GDLESPLSEE | FLQEMGNIQE   | ISQSIGEDSS  |
| drPPARAa    | ----        | MVDMPS      | LYSPSSPLGD | PIMYSPLSGE | LIGDMQVLED   | ISQSLSDDTF  |
| olPPARA     | ----        | M---AAE     | LYSPSSPLGD | SLLDSPLCGD | LIEDL---RK   | ISASIG--DNS |
| drPPARAb    | ----        | MVDMEN      | RYRPPSPLEA | SVLDS---   | ALFVRGMEELRD | ISQSMDEDAL  |
| omPPARA     | ----        | M---AR      | XYPSPSPLED | SVLGSPVCGD | FLGGMEELQD   | IPQSIDGDTL  |
| salsPPARA   | ----        | M---AS      | HYRPPSPLED | SVLGSPVCGD | FLGGMEELQD   | ISQSIDGDAL  |
| Consistency | 0000        | *66567      | 464858**75 | 5595*87657 | 8866944787   | *899875976  |
|             |             | 60          | 70         | 80         | 90           | 100         |
| mmPPARA     | GSFGFADYQY  | LGSCPGSEGS  | V---ITDTLS | PASSPSSVSC | PVIPASTDES   |             |
| rnPPARA     | GSFSFADYQY  | LGSCPGSEGS  | V---ITDTLS | PASSPSSVSC | PAVPTSTDES   |             |
| btPPARA     | GSFSFTEYQY  | LGSGPGSDGS  | V---ITDTLS | PASSPSSVSY | PAVPGSAEES   |             |
| clPPARA     | GSFSFTEYQY  | LGSGPGSDGS  | V---ITDTLS | PAPSPSSVTH | PAAPGGAEEP   |             |
| ssPPARA     | GSFSFTDYQY  | LGSGPGSDGS  | V---ITDTLS | PASSPSSVTY | PVAPAGADES   |             |
| hsPPARA     | GSFGFTEYQY  | LGSCPGSDGS  | V---ITDTLS | PASSPSSVTY | PVVPGSVDES   |             |
| ggPPARA     | GALSLTEFQS  | LGNGPGSDGS  | V---ITDTLS | PASSPSSINF | ATAPGSIDES   |             |
| xlPPARA     | TPFGASEHQF  | FGNSPGSIGS  | VSTDLTDTLS | PASSPASITF | PAASGSAEDA   |             |
| macfPPARA   | GSFGFTEYQY  | LGSCPGSDGS  | V---ITDTLS | PASSPSSVTY | PVVPGSVDES   |             |
| macmPPARA   | GSFSFTEYQY  | LGSCPGSDGS  | V---ITDTLS | PASSPSSVTY | PVVPGSVDES   |             |
| drPPARAa    | NSFHMLDYQN  | CDTAVDNSS-  | ---ILDVLT  | PASSPSSEVF | -SASTGQDEN   |             |
| olPPARA     | LEFDFPECQR  | ND--SGAKSS  | V---MPDPLT | PASSPSPEVC | GAAPA--AED   |             |
| drPPARAb    | SSFEMTENQS  | -GLSGSESS   | T---ELDALT | PASSPSSGVY | G-CPVGQDEF   |             |
| omPPARA     | SSLDVPEYLS  | QSS--NGSEGS | T---VLDALT | PASSPSSGGY | G-AAAGLEEF   |             |
| salsPPARA   | SSLDVPEYQS  | QSS--NGSEGS | T---VLDALT | PASSPSSGGY | G-AAAGLEEF   |             |
| Consistency | 5785658685  | 4762598688  | 700076*6*8 | *9*99555   | 5467564795   |             |
|             |             | 110         | 120        | 130        | 140          | 150         |
| mmPPARA     | PGSALNIECR  | ICGDKASGYH  | YGVHACEGCK | GFFRRTIRLK | LVYDKCDRSC   |             |
| rnPPARA     | PGNALNIECR  | ICGDKASGYH  | YGVHACEGCK | GFFRRTIRLK | LAYDKCDRSC   |             |
| btPPARA     | SSIALNIECR  | ICGDKASGYH  | YGVHACEGCK | GFFRRTIRLK | LVYDKCDRSC   |             |
| clPPARA     | SSVALNIECR  | ICGDRASGYH  | YGVHACEGCK | GFFRRTIRLK | LAYDKCDRSC   |             |
| ssPPARA     | PSVALNIECR  | ICGDKASGYH  | YGVHACEGCK | GFFRRTIRLK | LVYDKCDRSC   |             |
| hsPPARA     | PSGALNIECR  | ICGDKASGYH  | YGVHACEGCK | GFFRRTIRLK | LVYDKCDRSC   |             |
| ggPPARA     | PSGAENIECR  | ICGDKASGYH  | YGVHACEGCK | GFFRRTIRLK | LIYDKCDRNC   |             |
| xlPPARA     | ACKSLNLECR  | VCSDKASGFH  | YGVHACEGCK | GFFRRTIRLK | LVYDRCCERM   |             |
| macfPPARA   | PSGALNIECR  | ICGDKASGYH  | YGVHACEGCK | GFFRRTIRLK | LVYDKCDRSC   |             |
| macmPPARA   | PSGALNIECR  | ICGDKASGYH  | YGVHACEGCK | GFFRRTIRLK | LVYDKCDRSC   |             |
| drPPARAa    | SSGSLTLECR  | VCADRASGFH  | YGVHACEGCK | GFFRRTIRLK | LEYDKCERNC   |             |
| olPPARA     | SVGPLSLLECR | VCSDRASGFH  | YGVHACEGCK | GFFRRTIRLK | LEYNKCERNC   |             |
| drPPARAb    | TSTSLNLECR  | VCSDRASGYH  | YGVHACEGCK | GFFRRTIRLK | LEYDKCERRC   |             |
| omPPARA     | SSTSLNLECR  | VCADRASGYH  | YGVHACEGCK | GFFRRTIRLK | LEYDKCERRC   |             |
| salsPPARA   | SSTSLNLECR  | VCADRASGYH  | YGVHACEGCK | GFFRRTIRLK | LEYDKCERRC   |             |
| Consistency | 5647888**   | 9*6*8***8*  | *****      | *****      | *5*99*8*5*   |             |
|             |             | 160         | 170        | 180        | 190          | 200         |
| mmPPARA     | KIQKKNRNKC  | QYCRFHKCLS  | VGMSHNAIRF | GRMPRSEKAK | LKAEILTCEH   |             |
| rnPPARA     | KIQKKNRNKC  | QYCRFHKCLS  | VGMSHNAIRF | GRMPRSEKAK | LKAEILTCEH   |             |
| btPPARA     | KIQKKNRNKC  | QYCRFHKCLS  | VGMSHNAIRF | GRMPRSEKAK | LKAEILTCEH   |             |
| clPPARA     | KIQKKNRNKC  | QYCRFHKCLS  | VGMSHNAIRF | GRMPRSEKAK | LKAEILTCEQ   |             |
| ssPPARA     | KIQKKNRNKC  | QYCRFHKCLS  | AGMSHNAIRF | GRMPRSEKAK | LKAEILTCEH   |             |
| hsPPARA     | KIQKKNRNKC  | QYCRFHKCLS  | VGMSHNAIRF | GRMPRSEKAK | LKAEILTCEH   |             |
| ggPPARA     | KIQKKNRNKC  | QYCRFQKCLS  | VGMSHNAIRF | GRMPRSEKAK | LKAEILTGEN   |             |
| xlPPARA     | KIQKKNRNKC  | QYCRFEKCLN  | VGMSHNAIRF | GRMPRSEKAK | LKAEVLMCDQ   |             |
| macfPPARA   | KIQKKNRNKC  | QYCRFHKCLS  | VGMSHNAIRF | GRMPRSEKAK | LKAEILTCEH   |             |
| macmPPARA   | KIQKKNRNKC  | QYCRFHKCLS  | VGMSHNAIRF | GRMPRSEKAK | LKAEILTCEH   |             |
| drPPARAa    | KIQKKNRNKC  | QYCRFNKCM   | VGMSHNAIRF | GRMPQSEKQR | LKAEQDVSGK   |             |
| olPPARA     | KIQKKNRNKC  | QYCRFNKCM   | VGMSHNAIRF | GRMPHAEKLL | LKEESKVAEK   |             |
| drPPARAb    | KIQKKNRNKC  | QYCRFQKCLS  | VGMSHNAIRF | GRMPQSEKLR | LKAEILTGER   |             |
| omPPARA     | KIQKKNRNKC  | QYCRFQKCLS  | VGMSHNAIRF | GRMPQSEKLL | LKAEILTGDR   |             |
| salsPPARA   | KIQKKNRNKC  | QYCRFQKCLS  | VGMSHNAIRF | GRMPQSEKLL | LKAEILTGDR   |             |
| Consistency | *****       | *****6*97   | 9*****     | *9*79*69   | *9*777575    |             |

|             | 210     | 220    | 230         | 240         | 250        |             |
|-------------|---------|--------|-------------|-------------|------------|-------------|
| mmPPARA     | DLKDS   | ETADL  | KSLGKRIHEA  | YLNENNMNKV  | KARVILAGKT | SNNPPFVIHD  |
| rnPPARA     | DLKDS   | ETADL  | KSLAKRIHEA  | YLNENNMNKV  | KARVILAGKT | SNNPPFVIHD  |
| btPPARA     | DLEDSE  | ETADL  | KSLAKRIYEA  | YLNENNMNKI  | KARVILAGKT | NNNPPFVIHD  |
| clPPARA     | DPEDA   | ETADL  | KSLAKRIYEA  | YLNENNMNKV  | KARVILAGKA | SNNPPFVIHD  |
| ssPPARA     | DLEDA   | ETADL  | KSLAKRIYEA  | YLNENNMNKV  | KARVILAGKA | SNNPPFVIHD  |
| hsPPARA     | DIEDSE  | ETADL  | KSLAKRIYEA  | YLNENNMNKV  | KARVILSGKA | SNNPPFVIHD  |
| ggPPARA     | YVEDSE  | ETADL  | KSLAKRIHDA  | YLNENNMNKV  | KARVILAGKT | NNNPPFVIHD  |
| xlPPARA     | DVKDTQ  | ETADL  | LSLARLIYDA  | YLNENNMNKV  | KARAILTGKA | SN-PPFVIHD  |
| macfPPARA   | DIEDSE  | ETADL  | KSLAKRIYEA  | YLNENNMNKV  | KARVILSGKA | SNNPPFVIHD  |
| macmPPARA   | DIEDSE  | ETADL  | KSLAKRIYEA  | YLNENNMNKV  | KARVILSGKA | SNNPPFVIHD  |
| drPPARAa    | EEHKCQ  | QPPDM  | RSLARQMHEA  | YLNENNMNKA  | KARVFLTGKT | S-T-PPFVIHD |
| olPPARA     | EVESE   | MEGEGD | KTLLVRQIHDA | YMKSFMTMKA  | KARLILTGKT | S-E-PPFVIHD |
| drPPARAb    | DVED--- | ---DQ  | KTLLAKQIYEA | YVKNENNMNKS | KARTILTGKT | S-T-PPFVIHD |
| omPPARA     | EVEDPQ  | QADQ   | KTLLARHIYEA | YLNENNMNKA  | KARTILTGKT | S-T-PPFVIHD |
| salsPPARA   | EVEDPQ  | QADQ   | KTLLARHIYEA | YLNENNMNKA  | KARTILTGKT | S-T-PPFVIHD |
| Consistency | 76784   | 657*6  | 88*886978*  | *9*8*8***7  | ***79*6**7 | 845***9***  |

|             | 260        | 270            | 280           | 290        | 300              |
|-------------|------------|----------------|---------------|------------|------------------|
| mmPPARA     | METLCMAEKT | LVAKMVAN       | ---           | ---        | GVEDKEAE         |
| rnPPARA     | METLCMAEKT | LVAKMVAN       | ---           | ---        | GVENKEAE         |
| btPPARA     | METLCMAEKT | LVAKLVAN       | ---           | ---        | GIQNKAEAE        |
| clPPARA     | METLCMAEKT | LVAKLVAN       | ---           | ---        | GIQNKAEAE        |
| ssPPARA     | METLCMAEKT | LVAKLVAN       | ---           | ---        | GIQNKAEAE        |
| hsPPARA     | METLCMAEKT | LVAKLVAN       | ---           | ---        | GIQNKAEAE        |
| ggPPARA     | MDTLCMAEKT | LVAKLVAN       | ---           | ---        | GIQNKAEAE        |
| xlPPARA     | METLCMAEKT | LVAKLVAN       | ---           | ---        | GIQNKAEAE        |
| macfPPARA   | METLCMAEKT | LVAKLVAN       | ---           | ---        | GIQNKAEAE        |
| macmPPARA   | METLCMAEKT | LVAKLVAN       | ---           | ---        | GIQNKAEAE        |
| drPPARAa    | MDTLQHA    | EKK LVTQLLGN   | ---           | ---        | VASGD ISTLQEREVE |
| olPPARA     | MDTFQLA    | EERT FVAKMMGMS | ---           | ---        | CGGLLNKDP        |
| drPPARAb    | METLQLAEQT | LVAKMVG        | ---           | ---        | A GGHLEKEAE      |
| omPPARA     | METLQLAEQT | LVAKMVG        | ---           | ---        | A GGHLEKEAE      |
| salsPPARA   | METLQLAEQT | LVAKMVG        | ---           | ---        | A GSHLEKEAE      |
| Consistency | *8*957*    | *89 99988867   | 00 0000000000 | 0000000000 | 006867998*       |

|             | 310         | 320          | 330        | 340        | 350         |
|-------------|-------------|--------------|------------|------------|-------------|
| mmPPARA     | VRFFHCCQCM  | SVETVTELTE   | FAKAIPGFAN | LDLNDQVTLL | KYGVYEAIIFT |
| rnPPARA     | VRFFHCCQCM  | SVETVTELTE   | FAKAIPGFAN | LDLNDQVTLL | KYGVYEAIIFT |
| btPPARA     | VRIFHCCQCT  | SVETVTELTE   | FAKSIPGFAN | LDLNDQVTLL | KYGVYEAIIFA |
| clPPARA     | VRIFHCCQCT  | SVETVTELTE   | FAKSIPGFAN | LDLNDQVTLL | KYGVYEAIIFA |
| ssPPARA     | VRIFHCCQCT  | SVETVTELTE   | FAKSIPGFAS | LDLNDQVTLL | KYGVYEAIIFA |
| hsPPARA     | VRIFHCCQCT  | SVETVTELTE   | FAKAIPGFAN | LDLNDQVTLL | KYGVYEAIIFA |
| ggPPARA     | VRIFHCCQCT  | SVETVTELTE   | FAKSIPGFAN | LDLNDQVTLL | KYGVYEAIIFA |
| xlPPARA     | VRIFHCCQCT  | SVETVTELTE   | FAKSIPGFTE | LDLNDQVTLL | KYGVYEAMFA  |
| macfPPARA   | VRIFHCCQCT  | SVETVTELTE   | FAKAIPGFAN | LDLNDQVTLL | KYGVYEAIIFA |
| macmPPARA   | VRIFHCCQCT  | SVETVTELTE   | FAKAIPGFAN | LDLNDQVTLL | KYGVYEAIIFA |
| drPPARAa    | ARLFLFCQYA  | SVATVTELTE   | YAKAVPGFAD | LDLNDQVTLL | KYGVYEALFT  |
| olPPARA     | ARLFLHCCQST | SVETVTELTE   | FAKAMPDFKT | LDLNDQVTLL | KYAVHEALFT  |
| drPPARAb    | VRIFHCCQCT  | SVETVTELTE   | FAKSVPGFAN | LDLNDQVTLL | KYGVHEALFA  |
| omPPARA     | VRIFHCCQCT  | SVETVTELTE   | FAKSVPGFSS | LDLNDQVTLL | KYGVYEALFA  |
| salsPPARA   | VRIFHCCQCT  | SVETVTELTE   | FAKSVPGFSS | LDLNDQVTLL | KYGVYEALFA  |
| Consistency | 8*8*88*     | *87 **9***** | 9**88*9*76 | *****      | **9*8*8*7   |

|             | 360        | 370        | 380        | 390        | 400        |
|-------------|------------|------------|------------|------------|------------|
| mmPPARA     | MLSSLMNKDG | MLIAYGNGFI | TREFLKNLRK | PFCDIMEPKF | DFAMKFNAL  |
| rnPPARA     | MLSSLMNKDG | MLIAYGNGFI | TREFLKNLRK | PFCDIMEPKF | DFAMKFNAL  |
| btPPARA     | MLSSVMNKDG | MLVAYGNGFI | TREFLKSLRK | PFCDIMEPKF | DFAMKFNAL  |
| clPPARA     | MLSSVMNKDG | MLVAYGNGFI | TREFLKSLRK | PFCDIMEPKF | DFAMKFNAL  |
| ssPPARA     | MLSSVMNKDG | MLVAYGNGFI | TREFLKSLRK | PFCDIMEPKF | DFAMKFNAL  |
| hsPPARA     | MLSSVMNKDG | MLVAYGNGFI | TREFLKSLRK | PFCDIMEPKF | DFAMKFNAL  |
| ggPPARA     | MLASVMNKDG | MLVAYGNGFI | TREFLKSLRK | PFCDIMEPKF | DFAMKFNAL  |
| xlPPARA     | MLASVMNKDG | MLVAYGNGFI | TREFLKSLRK | PIGDMMEPKF | EFAMKFNAL  |
| macfPPARA   | MLSSVMNKDG | MLVAYGNGFI | TREFLKSLRK | PFCDIMEPKF | DFAMKFNAL  |
| macmPPARA   | MLSSVMNKDG | MLVAYGNGFI | TREFLKSLRK | PFCDIMEPKF | DFAMKFNAL  |
| drPPARAa    | LLASCMNKDG | LLVAQGGGFI | TREFLKSLRK | PFSDMMEPKF | QFAMKFNAL  |
| olPPARA     | LLASCMNKDG | LLVARGGFI  | TREFLKSLRR | PFSDMMEPKF | QFATRFNSMD |
| drPPARAb    | LLASCMNKDG | LLVAYGSGFI | TREFLKSLRR | PFSDMMEPKF | QFAMKFNSLE |
| omPPARA     | LLASCMNKDG | LLVAYGSGFI | TREFLKSLRR | PFSDMMEPKF | QFAMKFNGL  |
| salsPPARA   | LLASCMNKDG | LLVAYGSGFI | TREFLKSLRR | PFSDMMEPKF | QFAMKFNGL  |
| Consistency | 8*8*6***** | 8*9*8*7*** | *****8**8  | *95*7***** | 7**99**799 |

|             |            |            |            |             |            |     |
|-------------|------------|------------|------------|-------------|------------|-----|
|             | .....      | 410.....   | 420.....   | 430.....    | 440.....   | 450 |
| mmPPARA     | LDDSDISLFV | AAIICCGDRP | GLLNIGYIEK | LQEGIVHVLK  | LHLQSNHPDD |     |
| rnPPARA     | LDDSDISLFV | AAIICCGDRP | GLLNIGYIEK | LQEGIVHVLK  | LHLQSNHPDD |     |
| btPPARA     | LDDSDISLFV | AAIICCGDRP | GLLNVGHIEK | MQEGIVHVLK  | LHLQNNHPDD |     |
| clPPARA     | LDDSDISLFV | AAIICCGDRP | GLLNVGHIEK | MQEGIVHVLK  | LHLQTNHPDN |     |
| ssPPARA     | LDDSDISLFV | AAIICCGDRP | GLLNVGHIEK | MQEGIVHVLK  | LHLQTNHPDD |     |
| hsPPARA     | LDDSDISLFV | AAIICCGDRP | GLLNVGHIEK | MQEGIVHVLK  | LHLQSNHPDD |     |
| ggPPARA     | LDDSDISLFV | AAIICCGDRP | GLLNVGHIEK | MQEGIVHVLK  | LHLQTNHPDD |     |
| xlPPARA     | LDDSDISLFV | AAIICCGDRP | GLVNIPISEK | MQESIVHVLK  | LHLQSNHPDD |     |
| macfPPARA   | LDDSDISLFV | AAIICCGDRP | GLLNVGHIEK | MQEGIVHVLK  | LHLQSNHPDD |     |
| macmPPARA   | LDDSDISLFV | AAIICCGDRP | GLLNVGHIEK | MQEGIVHVLK  | LHLQSNHPDD |     |
| drPPARAa    | LDDSDALFV  | AAIICCGDRP | GLSNVPQIER | IQESVIHSLR  | LHLTSNHPDN |     |
| olPPARA     | LDDSDALFV  | AAIICCGDRP | GLVDIPVVER | LQESI IQALR | HHLLANHPDD |     |
| drPPARAb    | LDDSDALFV  | AAIICCGDRP | GLVNVPHIER | MQESIVNVLIH | LHLKSNHPDH |     |
| omPPARA     | LDDSDALFV  | AAIICCGDRP | GLVNVTHIEC | MQENIVQVLQ  | LHLLANHPDD |     |
| salsPPARA   | LDDSDALFV  | AAIICCGDRP | GLVNVTHIEC | MQENIVQVLQ  | LHLLANHPDD |     |
| Consistency | *****88*** | **9*8***** | **799569*6 | 8**69978*6  | 8**67****7 |     |

|             |             |            |             |            |           |  |
|-------------|-------------|------------|-------------|------------|-----------|--|
|             | .....       | 460.....   | 470.....    | 480.....   | 490.....  |  |
| mmPPARA     | TFLFPKLLQK  | MVDLRQLVTE | HAQLVQVIKK  | TESDAALHPL | LQEIYRDMY |  |
| rnPPARA     | TFLFPKLLQK  | MVDLRQLVTE | HAQLVQVIKK  | TESDAALHPL | LQEIYRDMY |  |
| btPPARA     | VFLFPKLLQK  | MADLRQLVTE | HAQLVQVIKK  | TESDAALHPL | LQEIYRDMY |  |
| clPPARA     | IFLFPKLLQK  | MADLRQLVTE | HAQLVQVIKK  | TESDAALHPL | LQEIYRDMY |  |
| ssPPARA     | VFLFPKLLQK  | LADLRQLVTE | HAQLVQVIKK  | TEADAALHPL | LQEIYRDMY |  |
| hsPPARA     | IFLFPKLLQK  | MADLRQLVTE | HAQLVQVIKK  | TESDAALHPL | LQEIYRDMY |  |
| ggPPARA     | IFLFPKLLQK  | MADLRQLVTE | HAQLVQVIKK  | TESDAALHPL | LQEIYRDMY |  |
| xlPPARA     | SFLFPKLLQK  | MADLRQLVTE | HAQLVQVIKK  | TETDAALHPL | LQEIYRDMY |  |
| macfPPARA   | IFLFPKLLQK  | MADLRQLVTE | HAQLVQVIKK  | TESDAALHPL | LQEIYRDMY |  |
| macmPPARA   | IFLFPKLLQK  | MADLRQLVTE | HAQLVQVIKK  | TESDAALHPL | LQEIYRDMY |  |
| drPPARAa    | SLFLFPKLLQK | LADLRQLVTE | HAQLVQVIKK  | TESDAALHPL | LQEIYRDMY |  |
| olPPARA     | TFLFPKLLQK  | LADLRQLVTE | HAQLVQVIKK  | TESDAALHPL | LQEIYRDMY |  |
| drPPARAb    | GFLFPKLLQK  | LADLRQLVTE | HAQLVQVIKK  | TESDAALHPL | LQEIYRDMY |  |
| omPPARA     | TFLFPKLLQK  | LADLRQLVTE | HAQLVQVIKK  | TESDAALHPL | LQEIYRDMY |  |
| salsPPARA   | TFLFPKLLQK  | LADLRQLVTE | HAQLVQVIKK  | TESDAALHPL | LQEIYRDMY |  |
| Consistency | 59***8****  | 88***9**** | **9*9*5*9*6 | 9*3*77**** | *****9*** |  |

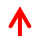

## Supplemental data 2B: Protein alignment PPARD

Unconserved 0 1 2 3 4 5 6 7 8 9 10 Conserved

|             |                 |            |             |              |              |
|-------------|-----------------|------------|-------------|--------------|--------------|
|             | ..... 10 .....  | 20 .....   | 30 .....    | 40 .....     | 50           |
| mmPPARD     | -----           | -----      | -----       | -----        | -----        |
| rnPPARD     | -----           | -----      | -----       | -----        | -----        |
| ggPPARD     | -----           | -----      | -----       | -----        | -----        |
| hsPPARD     | -----           | -----      | -----       | -----        | -----        |
| macfPPARD   | -----           | -----      | -----       | -----        | -----        |
| macmPPARD   | -----           | -----      | -----       | -----        | -----        |
| btPPARD     | -----           | -----      | -----       | -----        | -----        |
| ssPPARD     | -----           | -----      | -----       | -----        | -----        |
| clPPARD     | -----           | -----      | -----       | -----        | -----        |
| omPPARD     | -----           | -----      | -----       | -----        | -----        |
| olPPARD     | MDGFQHSAAK      | QF--EGVNGY | FEP-ASPQDT  | ADVRWKHPEG   | -E           |
| drPPARDb    | MEQVEEPTSE      | MKCDGQVDGV | MKS-QSSLQT  | ELSSVPILRD   | -AAWLGAQEG   |
| drPPARDa    | -----           | MSV        | CEMDRRHVLA  | LRSRLPRNLG   | SVGGVYM-DP   |
| xlPPARD     | -----           | -----      | -----       | -----        | -----        |
| salsPPARD   | -----           | -----      | -----       | -----        | -----        |
| Consistency | 0000000000      | 0000000000 | 0000000000  | 0000000000   | 0000000000   |
|             |                 |            |             |              |              |
|             | ..... 60 .....  | 70 .....   | 80 .....    | 90 .....     | 100          |
| mmPPARD     | -----           | MEQPQE     | ETPEARREEEK | E            | EVAM GDG     |
| rnPPARD     | -----           | MEQPQE     | ETPEARREEEK | E            | EVAT GDG     |
| ggPPARD     | -----           | MEQLQEEVP  | EVREEEEEEE  | E            | AVTV PSG     |
| hsPPARD     | -----           | MEQPQE     | APEVREEEEK  | E            | EVAE AEG     |
| macfPPARD   | -----           | MEQPQE     | APEVREEEEK  | E            | EVAE AEG     |
| macmPPARD   | -----           | MEQPQE     | APEVREEEEK  | E            | EVAE AEG     |
| btPPARD     | -----           | MEQPPE     | APEARPEEEK  | E            | EAAG AEG     |
| ssPPARD     | -----           | MEQPPE     | APEVREEEEK  | K            | EVAE AEG     |
| clPPARD     | -----           | MEQPPGE    | AAEVREEEEK  | K            | EVAE AEG     |
| omPPARD     | -----           | M-KSSDE    | --EVVQEQE   | D            | QQEK GSS     |
| olPPARD     | -SAGSDSCG       | -ETSGFELTD | VQELKTRES   | DEEGKEEAPP   | SKSPKRDPKK   |
| drPPARDb    | ESASSDCGGT      | SDLQEPSSVS | GEEVEGSETS  | DITGLEASPG   | SKGSWGGNQO   |
| drPPARDa    | GDSSPCSSQG      | EGPDDQRLQD | VLCELGEAG   | LNLELESEGG   | VA-----L     |
| xlPPARD     | -----           | -----      | -----       | -----        | -----        |
| salsPPARD   | -----           | -----      | -----       | -----        | -----        |
| Consistency | 0000000000      | 0445335300 | 3244335644  | 4000005443   | 4450000000   |
|             |                 |            |             |              |              |
|             | ..... 110 ..... | 120 .....  | 130 .....   | 140 .....    | 150          |
| mmPPARD     | -----           | APELN      | GGPEHTLPSS  | SCADLSQNSS   | PSS--LLDQLQ  |
| rnPPARD     | -----           | APELN      | GGPEHTLPSS  | SCTDLSQNSS   | PSS--LLDQLQ  |
| ggPPARD     | -----           | ASDPS      | AGPDSSLPSS  | SYTDLSQSSS   | P--S--LSDQLQ |
| hsPPARD     | -----           | APELN      | GGPQHALPSS  | SYTDLSRSSS   | PPS--LLDQLQ  |
| macfPPARD   | -----           | APELN      | GGPQHALPSS  | SYTDLSRSSS   | PPS--LLDQLQ  |
| macmPPARD   | -----           | APELN      | GGPQHALPSS  | SYTDLSRSSS   | PPS--LLDQLQ  |
| btPPARD     | -----           | APELN      | GGPEHSLPSS  | SYTDLSQSCS   | PLS--LLDQLQ  |
| ssPPARD     | -----           | GPELN      | GGPEHSLPSS  | SCTDLSQSCS   | PPA--LLDQLQ  |
| clPPARD     | -----           | APELN      | GGPEHSLPSS  | SYTDLSRSSS   | PPS--LLDQLQ  |
| omPPARD     | -----           | NSHST      | SNMDSPALSS  | SCTDLSQTSS   | P--S--LSDQLL |
| olPPARD     | REGECQDQEN      | NQNKQNNNAS | SSYTDLSHTS  | SPS--LSEQLR  | LGREDNAGSG   |
| drPPARDb    | NGDRTPQESP      | PPNSETPVTA | GAFSDPLQVP  | SLS--LSDQLR  | LGREDPNKLG   |
| drPPARDa    | QGEELSWETS      | RQEEQSNTSS | TSPDRSSAST  | DLS--TALSEQ  | LLRGREEVSG   |
| xlPPARD     | -----           | -----      | MKEEIP      | PRSP--ILDEQP | STPLEHQETS   |
| salsPPARD   | -----           | -----      | -----       | -----        | -----        |
| Consistency | 0000043535      | 4444444467 | 6346565556  | 6280757766   | 6635445355   |
|             |                 |            |             |              |              |
|             | ..... 160 ..... | 170 .....  | 180 .....   | 190 .....    | 200          |
| mmPPARD     | LNMECRVCGD      | KASGFHYGVH | ACEGCKGFFR  | RTIRMKLEYE   | KCDRICKIQK   |
| rnPPARD     | LNMECRVCGD      | KASGFHYGVH | ACEGCKGFFR  | RTIRMKLEYE   | KCDRICKIQK   |
| ggPPARD     | LNVECRVCGD      | KASGFHYGVH | ACEGCKGFFR  | RTIRMKLEYE   | KCERSCKIQK   |
| hsPPARD     | LNMECRVCGD      | KASGFHYGVH | ACEGCKGFFR  | RTIRMKLEYE   | KCERSCKIQK   |
| macfPPARD   | LNMECRVCGD      | KASGFHYGVH | ACEGCKGFFR  | RTIRMKLEYE   | KCERSCKIQK   |
| macmPPARD   | LNMECRVCGD      | KASGFHYGVH | ACEGCKGFFR  | RTIRMKLEYE   | KCERSCKIQK   |
| btPPARD     | LNMECRVCGD      | KASGFHYGVH | ACEGCKGFFR  | RTIRMKLEYE   | KCERICKIQK   |
| ssPPARD     | LSMECRVCGD      | KASGFHYGVH | ACEGCKGFFR  | RTIRMKLEYE   | KCERICKIQK   |
| clPPARD     | LNMECRVCGD      | KASGFHYGVH | ACEGCKGFFR  | RTIRMKLEYE   | KCERICKIQK   |
| omPPARD     | LNVECRICGD      | KASGFHYGVH | ACEGCKGFFR  | RTIRMKLDYE   | RCERSCKIQK   |
| olPPARD     | ISVECKVCGD      | KASGFHYGVH | ACEGCKGFFR  | RTVRMKLEYE   | RCERSCKIQK   |
| drPPARDb    | LNVECRICGD      | KASGFHYGVH | ACEGCKGFFR  | RTIRMKLEYE   | RCERACKVQK   |
| drPPARDa    | LNMECRICGD      | RASGFHYGVH | ACEGCKGFFR  | RTIRMKLEYE   | RCERSCKIQK   |
| xlPPARD     | QSVCKICGD       | RASGFHYGVH | ACEGCKGFFR  | RTIRMLQYE    | HCDRNCKIQK   |
| salsPPARD   | -----           | -----      | -----       | -----        | -CERRCKIQK   |
| Consistency | 6768878888      | 7888888888 | 8888888888  | 8888888788   | 6*8*5**9**   |



|             |            |             |            |            |            |
|-------------|------------|-------------|------------|------------|------------|
|             | 210.       | 220.        | 230.       | 240.       | 250        |
| mmPPARD     | KNRNKCQYCR | FQKCLALGMS  | HNAIRFGRMP | EAEKRRLVAG | LTASE-GCQH |
| rnPPARD     | KNRNKCQYCR | FQKCLALGMS  | HNAIRFGRMP | EAEKRRLVAG | LTASE-GCQQ |
| ggPPARD     | KNRNKCQYCR | FQKCLSLGMS  | HNAIRFGRMP | EAEKRRLVAG | LTASE-ISCQ |
| hsPPARD     | KNRNKCQYCR | FQKCLALGMS  | HNAIRFGRMP | EAEKRRLVAG | LTANE-GSQY |
| macfPPARD   | KNRNKCQYCR | FQKCLALGMS  | HNAIRFGRMP | EAEKRRLVAG | LTANE-GSQY |
| macmPPARD   | KNRNKCQYCR | FQKCLALGMS  | HNAIRFGRMP | EAEKRRLVAG | LTANE-GSQY |
| btPPARD     | KNRNKCQYCR | FQKCLALGMS  | HNAIRFGRMP | EAEKRRLVAG | LTANE-GSQH |
| ssPPARD     | KNRNKCQYCR | FQKCLALGMS  | HNAIRFGRMP | EAEKRRLVAG | LTANE-GSQH |
| clPPARD     | KNRNKCQYCR | FQKCVLALGMS | HNAIRFGRMP | EAEKRRLVAG | LTANE-GTQH |
| omPPARD     | KSRNKCQYCR | FQKCLLLGMS  | HDAIRYGRMP | EAEKRRLVAG | LLAGEKAPT  |
| olPPARD     | KNRNKCQYCR | FQKCLSLGMS  | HDAIRYGRMP | EAEKRRLVAG | LLAEE-MNLS |
| drPPARDb    | KSRNKCQYCR | FQKCLALGMS  | HDAIRYGRMP | EAEKRRLVAG | LLAGE--NPQ |
| drPPARDa    | KSRNKCQYCR | FQKCLMLGMS  | HDAIRYGRMP | EAEKRRLVAG | LLAGE-RGSQ |
| xlPPARD     | KNRNKCQYCR | FNKCLSLGMS  | HNAIRFGRMP | EAEKRRLVQA | PVSDS--AAP |
| salsPPARD   | KSRNKCQYCR | FQKCLLLGMS  | HDAIRYGRMP | EAEKRRLVAG | LLAGDTAPT  |
| Consistency | *8*****9** | *9**96****  | *7***8**** | *9*99***99 | 8695803454 |

|             |            |            |             |             |            |
|-------------|------------|------------|-------------|-------------|------------|
|             | 260.       | 270.       | 280.        | 290.        | 300        |
| mmPPARD     | NPQLADLKAF | SKHIYNAYLK | NFNMTKKKAR  | SILTGKSSHN  | A-----PFVI |
| rnPPARD     | NPQLADLKAF | SKHIYNAYLK | NFNMTKKKAR  | SILTGKSSHN  | A-----PFII |
| ggPPARD     | NPQVADLKAF | SKHIYNAYLK | NFNMTKKKAR  | GILTGKASST  | P-----PFVI |
| hsPPARD     | NPQVADLKAF | SKHIYNAYLK | NFNMTKKKAR  | SILTGKASHT  | A-----PFVI |
| macfPPARD   | NPQVADLKAF | SKHIYNAYLK | NFNMTKKKAR  | SILTGKASHT  | A-----PFVI |
| macmPPARD   | NPQVADLKAF | SKHIYNAYLK | NFNMTKKKAR  | SILTGKASHT  | A-----PFVI |
| btPPARD     | NPQVADLKAF | SKHIYSAYLK | NFNMTKKKAR  | GILTGKASHT  | A-----PFVI |
| ssPPARD     | NPQVADLKAF | SKHLYSAYLK | NFNMTKKKAR  | AILTGKASHT  | A-----PFVI |
| clPPARD     | NPQVADLKAF | SKHIYNAYLK | NFNMTKKKAR  | GILTGKASHT  | A-----PFVI |
| omPPARD     | NPNSSDLKSL | AKRVNNAYLK | NLNMTKKKAR  | SILTGKTSST  | PVAYPYPFVI |
| olPPARD     | KPGGSDLKTL | AKQVNTAYQK | NLSMTKKKAR  | SILTGKTSST  | S-----PFVI |
| drPPARDb    | SSSGADLKTL | AKHVNTAYLR | NLNMTKKKAR  | SILTGKTSCT  | A-----PFVI |
| drPPARDa    | NSNESDLKTL | AKRVNNAYLK | NLNMTKKKAR  | NILTGKTSAS  | T-----PFVI |
| xlPPARD     | DSPVSDLDVL | SQLIHSSYMN | TFTMTKKRAR  | DILTGGRNIS  | -----PFVI  |
| salsPPARD   | NPNGSDLKSL | AKRVNNAYLK | NLNMTKKKAR  | SILTGKNSSS  | PVAYPYPFVI |
| Consistency | 87648**877 | 8969579*88 | 978*****9** | 6*****96*57 | 500000**9* |

|             |             |            |            |            |            |
|-------------|-------------|------------|------------|------------|------------|
|             | 310.        | 320.       | 330.       | 340.       | 350        |
| mmPPARD     | HDIETLWQAE  | KGLVWKQLVN | GLPPYNEISV | HVFYRCQSTT | VETVRELTEF |
| rnPPARD     | HDIETLWQAE  | KGLVWKQLVN | GPPPYNEISV | HVFYRCQSTT | VETVRELTEF |
| ggPPARD     | HDMDTLWQAE  | KGLVWKQLVN | GIPPYKEIGV | HVFYRCQCTT | VETVRELTEF |
| hsPPARD     | HDIETLWQAE  | KGLVWKQLVN | GLPPYKEISV | HVFYRCQCTT | VETVRELTEF |
| macfPPARD   | HDIETLWQAE  | KGLVWKQLVN | GLPPYKEISV | HVFYRCQCTT | VETVRELIEF |
| macmPPARD   | HDIETLWQAE  | KGLVWKQLVN | GLPPYKEISV | HVFYRCQCTT | VETVRELIEF |
| btPPARD     | HDIETLWQAE  | KGLVWKQLVN | SLPPYKEISV | HVFYRCQCTT | VETVRELTEF |
| ssPPARD     | HDIETLWQAE  | KGLVWKQLVN | GLPPYKEISV | HVFYRCQCTT | VETVRELTEF |
| clPPARD     | HDIETLWQAE  | KGLVWKQLVN | GLPPYKEISV | HVFYRCQCTT | VETVRELTEF |
| omPPARD     | HDMDSLQAE   | NGLVWKQLIN | GTTPNKEIGV | HVFYRCQCTT | VETVRELTEF |
| olPPARD     | YDVETLWKAE  | SGLVWSQLVP | GAPLTKEIGV | HVFYRCQCTT | VETVRELTEF |
| drPPARDb    | HDMDSLQAE   | NGLVWNQLNG | A-PLNKEIGV | HVFYRCQCTT | VETVRELTEF |
| drPPARDa    | HDMDSLQAE   | NGLVWNQVIH | GAPPNKEIGV | HVFYRCQCTT | VETVRELTEF |
| xlPPARD     | HDMDTLWQAE  | QGTVWEQLPT | QNLTGTEIGV | HVFYRCQCTS | VETVRALTDF |
| salsPPARD   | HDMDSLQAE   | NGLVWNQLIN | GTTPNKEIGV | HVFYRCQCTT | VETVRELTEF |
| Consistency | 9*788**69** | 6*9**7*976 | 747757**7* | *****8*9   | *****9*89* |

|             |             |            |            |            |            |
|-------------|-------------|------------|------------|------------|------------|
|             | 360.        | 370.       | 380.       | 390.       | 400        |
| mmPPARD     | AKNIPNFSLL  | FLNDQVTLLK | YGVHEAIFAM | LASIVNKDGL | LVANGSGFVT |
| rnPPARD     | AKNIPNFSLL  | FLNDQVTLLK | YGVHEAIFAM | LASIVNKDGL | LVANGSGFVT |
| ggPPARD     | AKSIPSFIDL  | YLNDQVTLLK | YGVHEAIFAM | LASIMNKDGL | LVANGNGFVT |
| hsPPARD     | AKSIPSFSSLL | FLNDQVTLLK | YGVHEAIFAM | LASIVNKDGL | LVANGSGFVT |
| macfPPARD   | AKSIPSFSSLL | FLNDQVTLLK | YGVHEAIFAM | LASIVNKDGL | LVANGSGFVT |
| macmPPARD   | AKSIPSFSSLL | FLNDQVTLLK | YGVHEAIFAM | LASIVNKDGL | LVANGSGFVT |
| btPPARD     | AKSIPSFIDL  | FLNDQVTLLK | YGVHEAIFAM | LASIVNKDGL | LVANGTGFVT |
| ssPPARD     | AKSIPSFIDL  | FLNDQVTLLK | YGVHEAIFAM | LASIVNKDGL | LVANGTGFVT |
| clPPARD     | AKSIPSFSSLL | FLNDQVTLLK | YGVHEAIFAM | LASIVNKDGL | LVANGTGFVT |
| omPPARD     | AKSIPSGFVLD | FLNDQVTLLK | YGVHEAIFAM | LPSLMNKDGL | LVANGKGFVT |
| olPPARD     | AKCIPGFDL   | YLNDQVTLLK | YGVHGAIFAM | LPSLMNKDGL | LVANGKGFVT |
| drPPARDb    | AKNIPGFDL   | FLNDQVTLLK | YGVHEAIFAM | LPSLMNKDGL | LVANGKGFVT |
| drPPARDa    | AKSIPGFDL   | FLNDQVTLLK | YGVHEAIFAM | LPSLMNKDGL | LVANGRGFVT |
| xlPPARD     | AKRIPGFDL   | FLNDQVTLLK | YGVHEAIFCM | LASLMNKDGL | LVAGGRGFVT |
| salsPPARD   | AKSIPGFDL   | FLNDQVTLLK | YGVHEAIFAM | LPSLMNKDGL | LVANGKGFVT |
| Consistency | 9*6**6*45*  | 8*****     | ****8***9* | *6*87***** | ***9*5**** |

|             |             |             |            |            |            |      |       |      |       |     |
|-------------|-------------|-------------|------------|------------|------------|------|-------|------|-------|-----|
|             | .....       | 410.        | .....      | 420.       | .....      | 430. | ..... | 440. | ..... | 450 |
| mmPPARD     | HEFLRSLRKP  | FSDIIEPKFE  | FAVKFNALEL | DDSDLALFIA | AIILCGDRPG |      |       |      |       |     |
| rnPPARD     | HEFLRSLRKP  | FSDIIEPKFE  | FAVKFNALEL | DDSDLALFIA | AIILCGDRPG |      |       |      |       |     |
| ggPPARD     | REFLRTLRLKP | FNEIMEPKFE  | FAVKFNALEL | DDSDLALFVA | AIILCGDRPG |      |       |      |       |     |
| hsPPARD     | REFLRLSLRKP | FSDIIEPKFE  | FAVKFNALEL | DDSDLALFIA | AIILCGDRPG |      |       |      |       |     |
| macfPPARD   | REFLRLSLRKP | FSDIIEPKFE  | FAVKFNALEL | DDSDLALFIA | AIILCGDRPG |      |       |      |       |     |
| macmPPARD   | REFLRLSLRKP | FSDIIEPKFE  | FAVKFNALEL | DDSDLALFIA | AIILCGDRPG |      |       |      |       |     |
| btPPARD     | REFLRLSLRKP | FSDIIEPKFE  | FAVKFNALEL | DDSDLALFIA | AIILCGDRPG |      |       |      |       |     |
| ssPPARD     | REFLRLSLRKP | FSDIIEPKFE  | FAVKFNALEL | DDSDLALFIA | AIILCGDRPG |      |       |      |       |     |
| clPPARD     | REFLRLSLRKP | FSDIIEPKFE  | FAVKFNALEL | DDSDLALFIA | AIILCGDRPG |      |       |      |       |     |
| omPPARD     | REFLRLSLRRP | FSEIMEPKLE  | FAVKFNALEL | DDSDLALFVA | AIILCGDRPG |      |       |      |       |     |
| olPPARD     | REFLRLSLRKP | FSEIMEPKFE  | FAVKFNALEL | DDSDLALFVA | AIILCGDRPG |      |       |      |       |     |
| drPPARDb    | REFLRLSLRKP | FSEIMEPKFE  | FAVKFNALEL | DDSDLALFVA | AIILCGDRPG |      |       |      |       |     |
| drPPARDa    | REFLRLSLRKP | FSEIMEPKFE  | FAVKFNALEL | DDSDLALFVA | AIILCGDRPG |      |       |      |       |     |
| xlPPARD     | REFLRLSLRQP | FCHIMEPKFH  | FASKFNALEL | NDSDLALFVA | SIILCGDRPG |      |       |      |       |     |
| salsPPARD   | REFLRLSLRRP | FSEIMEPKFE  | FAVKFNALEL | DDSDLALFVA | AIILCGDRPG |      |       |      |       |     |
| Consistency | 8****99*8*  | *87*7****99 | **9*****   | 9****9**9* | 9*****7    |      |       |      |       |     |

|             |            |            |            |            |            |      |       |      |       |     |
|-------------|------------|------------|------------|------------|------------|------|-------|------|-------|-----|
|             | .....      | 460.       | .....      | 470.       | .....      | 480. | ..... | 490. | ..... | 500 |
| mmPPARD     | LMNVQVEAI  | QDTILRALEF | HLQVNHPDSQ | YLFPKLLQKM | ADLRQLVTEH |      |       |      |       |     |
| rnPPARD     | LMNVQVEAI  | QDTILQALEF | HLQVNHPDSQ | YLFPKLLQKM | ADLRQLVTEH |      |       |      |       |     |
| ggPPARD     | LMNVKQVEEI | QDNILRALEF | HLQSNHPDAQ | YLFPKLLQKM | ADLRQLVTEH |      |       |      |       |     |
| hsPPARD     | LMNVPRVEAI | QDTILRALEF | HLQANHPDAQ | YLFPKLLQKM | ADLRQLVTEH |      |       |      |       |     |
| macfPPARD   | LMNVQVEAI  | QDTILRALEF | HLQANHPDAQ | YLFPKLLQKM | ADLRQLVTEH |      |       |      |       |     |
| macmPPARD   | LMNVQVEAI  | QDTILRALEF | HLQANHPDAQ | YLFPKLLQKM | ADLRQLVTEH |      |       |      |       |     |
| btPPARD     | LMNVQVEAI  | QDTILRALEF | HLQANHPDAQ | YLFPKLLQKM | ADLRQLVTEH |      |       |      |       |     |
| ssPPARD     | LMNVQVEAI  | QDTILRALEF | HLQANHPDAQ | YLFPKLLQKM | ADLRQLVTEH |      |       |      |       |     |
| clPPARD     | LINVPQVEAI | QDTILRALEF | HLQANHPYAQ | YLFPKLLQKM | ADLRQLVTEH |      |       |      |       |     |
| omPPARD     | LMNIKQVEEI | QDSILQALDQ | HLLANHTDSK | YLFPKLLNKM | ADLRQLVTEN |      |       |      |       |     |
| olPPARD     | LMNVKQVEQS | QDNILQALDL | HLQANHSDSL | YLFPKLLQKM | ADLRQLVTEN |      |       |      |       |     |
| drPPARDb    | LMNVKQVEQI | QDGILQALDQ | HLQVHHPDSS | HLFPKLLQKM | ADLRQLVTEN |      |       |      |       |     |
| drPPARDa    | LMNVHQVEKI | QDSILQALNQ | HLQLNHPDGR | FIFPRLQLKL | ADLRQLVTEN |      |       |      |       |     |
| xlPPARD     | LINPSQVEDI | QEGILGALRR | HLKASHTDAP | FLFPKLLHKM | ADLRQLVTEH |      |       |      |       |     |
| salsPPARD   | LMNIKQVEEI | QDSILQALDQ | HLLGNHADSH | YLFPKLLNKM | ADLRQLVTEN |      |       |      |       |     |
| Consistency | *8*859**59 | *96**6**75 | **768*6875 | 89**9**7*9 | *****7     |      |       |      |       |     |

|             |            |            |           |      |       |
|-------------|------------|------------|-----------|------|-------|
|             | .....      | 510.       | .....     | 520. | ..... |
| mmPPARD     | AQMMQWLKKT | ESETLLHPLL | QEIIYKDMY |      |       |
| rnPPARD     | AQMMQWLKKT | ESETLLHPLL | QEIIYKDMY |      |       |
| ggPPARD     | AQLVQKIKKT | ETETSLHPLL | QEIIYKDMY |      |       |
| hsPPARD     | AQMMQRIKKT | ETETSLHPLL | QEIIYKDMY |      |       |
| macfPPARD   | AQMMQRIKKT | ETETSLHPLL | QEIIYKDMY |      |       |
| macmPPARD   | AQMMQRIKKT | ETETSLHPLL | QEIIYKDMY |      |       |
| btPPARD     | AQMMQRIKKT | ETETSLHPLL | QEIIYKDMY |      |       |
| ssPPARD     | AQMMQRIKKT | ETETSLHPLL | QEIIYKDMY |      |       |
| clPPARD     | AQMMQRIKKT | ETETSLHPLL | QEIIYKDMY |      |       |
| omPPARD     | AMLVQKIKKT | ESETSLHPLL | QEIIYRDMY |      |       |
| olPPARD     | AQLVQKIKKT | ESETSLHPLL | QEIIYKDMY |      |       |
| drPPARDb    | AQLVQMIKKT | ESETSLHPLL | QEIIYKDMY |      |       |
| drPPARDa    | AQLVQKIKKT | ESETSLHPLL | QEIIYRDMY |      |       |
| xlPPARD     | AELVQSIKRT | ESSAALHPLL | QEIIYRDMY |      |       |
| salsPPARD   | AMLVQKIKKT | ESETSLHPLL | QEIIYRDI  |      |       |
| Consistency | *887*59*9* | *7997***** | ****8*99  |      |       |

## Supplemental data 2C: Protein alignment PPARG

Unconserved 0 1 2 3 4 5 6 7 8 9 10 Conserved

|             | 10          | 20          | 30          | 40         | 50           |
|-------------|-------------|-------------|-------------|------------|--------------|
| mmPPARGi1   | -----       | -----       | -----       | MVDTEMPF-W | PTNFGISSV    |
| rnPPARGi2   | -----       | -----       | -----       | MVDTEMPF-W | PTNFGISSV    |
| macfPPARG   | -----       | -----       | -----       | MVDTEMPF-W | PTNFGISSV    |
| ggPPARG     | -----       | -----       | -----       | MVDTEMPF-W | PVNFGISPV    |
| ocPPARG     | -----       | -----       | -----       | MVDTEMPF-W | PTNFGIGSV    |
| mmPPARGi2   | MGETLGDSPV  | DPEHGAFADA  | LPMSTSQEIT  | MVDTEMPF-W | PTNFGISSV    |
| rnPPARGi1   | MGETLGDPFV  | DPEHGAFADA  | LPMSTSQEIT  | MVDTEMPF-W | PTNFGISSV    |
| btPPARGi2   | MGETLGDAI   | DPESEPFVAVT | VSARTSQEIT  | MVDTEMPF-W | PTNFGISSV    |
| clPPARG     | MGETLGDSL   | DPESDSFADT  | LSASTSQETT  | MVDTEMPF-W | PTNFGISSV    |
| ssPPARG     | MGETLGDSL   | DPESDAF-DT  | LSANISQEV   | MVDTEMPF-W | PTNFGISSV    |
| hsPPARGi2   | MGETLGDSPI  | DPESDSFDT   | LSANISQEMT  | MVDTEMPF-W | PTNFGISSV    |
| macmPPARG   | MGETLGDSPI  | DPESDSFDT   | LSANISQEIT  | MVDTEMPF-W | PTNFGISSV    |
| drPPARG     | -----       | -MLHRRFS-   | -VQKASLSAD  | MVDTQTFG-W | PVGFGLSAL    |
| hsPPARGi1   | -----       | -----       | -MT         | MVDTEMPF-W | PTNFGISSV    |
| btPPARGi1   | -----       | -----       | -----       | MVDTEMPF-W | PTNFGISSV    |
| xlPPARG     | -----       | -----       | -----       | MVDTEMPF-W | SNLNFGMNSM   |
| olPPARG     | -----       | -----       | -----       | MVDTQQLLAW | P-VGFSLSSTV  |
| salsPPARG   | -----       | -----       | -----       | MVDTRRAA-W | SLLSFGLGTL   |
| omPPARG     | -----       | -----       | -----       | MVDTRRAA-W | SLLSFGLGTL   |
| Consistency | 1111111001  | 1111001000  | 1010011111  | ****87670* | 0678*98878   |
|             | 60          | 70          | 80          | 90         | 100          |
| mmPPARGi1   | DLSVMEDHSH  | SFDIKPFTTV  | DFSSISAPHY  | E          | -----        |
| rnPPARGi2   | DLSVMDDHSH  | SFDIKPFTTV  | DFSSISAPHY  | E          | -----        |
| macfPPARG   | DLSVMDDHSH  | SFDIKPFTTV  | DFSSISAPHY  | E          | -----        |
| ggPPARG     | DLSAMDDHMH  | SFDIKPFTTV  | DFSSISSPHY  | E          | -----        |
| ocPPARG     | DLSVMDDHSH  | SFDIKPFTTV  | DFSSISAPHY  | E          | -----        |
| mmPPARGi2   | DLSVMEDHSH  | SFDIKPFTTV  | DFSSISAPHY  | E          | -----        |
| rnPPARGi1   | DLSVMDDHSH  | SFDIKPFTTV  | DFSSISAPHY  | E          | -----        |
| btPPARGi2   | DLSMDDHSH   | AFDIKPFTTV  | DFSSISTPHY  | E          | -----        |
| clPPARG     | DLSVMDDHSH  | SFDIKPFTTV  | DFSSISTPHY  | E          | -----        |
| ssPPARG     | DLSVMDDHSH  | SFDIKPFTTV  | DFSSISTPHY  | E          | -----        |
| hsPPARGi2   | DLSVMEDHSH  | SFDIKPFTTV  | DFSSISTPHY  | E          | -----        |
| macmPPARG   | DLSVMDDHSH  | SFDIKPFTTV  | DFSSISAPHY  | E          | -----        |
| drPPARG     | ELEELEDTH   | SLDIKPFSTL  | DYSSISGIDY  | E          | -----        |
| hsPPARGi1   | DLSVMEDHSH  | SFDIKPFTTV  | DFSSISTPHY  | E          | -----        |
| btPPARGi1   | DLSMDDHSH   | AFDIKPFTTV  | DFSSISTPHY  | E          | -----        |
| xlPPARG     | DMSALEDHQC  | PYDIKPFTTV  | DFSSIN-SHY  | D          | -----        |
| olPPARG     | DLPEFNDSSH  | CLDMKHLSTS  | DYASISSSSI  | P          | -----        |
| salsPPARG   | DLVEMDNKMN  | SFDMKTLSTL  | DYPYLPSSLEY | SHNS       | -----        |
| omPPARG     | DLAEMDNKMN  | SFDMETLSTL  | DYPYLPSSLEY | SHNSPHHHSP | DRSHSFNHSP   |
| Consistency | 9976879778  | 78*89788*8  | *888985679  | 7000000000 | 0000000000   |
|             | 110         | 120         | 130         | 140        | 150          |
| mmPPARGi1   | DIP         | FT          | RADP        | -----      | MVADYKYD     |
| rnPPARGi2   | DIP         | FT          | RADP        | -----      | MVADYKYD     |
| macfPPARG   | DIP         | FT          | RTDP        | -----      | MVADYKYD     |
| ggPPARG     | DIP         | LG          | RADQ        | -----      | TSIDYKYD     |
| ocPPARG     | DLP         | FA          | RADP        | -----      | MVADYKYD     |
| mmPPARGi2   | DIP         | FT          | RADP        | -----      | MVADYKYD     |
| rnPPARGi1   | DIP         | FT          | RADP        | -----      | MVADYKYD     |
| btPPARGi2   | DIP         | FP          | RADP        | -----      | MVADYKYD     |
| clPPARG     | DIP         | FS          | RADP        | -----      | MVADYKYD     |
| ssPPARG     | DIP         | FP          | RADP        | -----      | MVADYKYD     |
| hsPPARGi2   | DIP         | FT          | RTDP        | -----      | VVADYKYD     |
| macmPPARG   | DIP         | FT          | RTDP        | -----      | MVADYKYD     |
| drPPARG     | NNP         | T           | QNDPT       | -----      | P-HMMDLTHMYS |
| hsPPARGi1   | DIP         | FT          | RTDP        | -----      | VVADYKYD     |
| btPPARGi1   | DIP         | FP          | RADP        | -----      | MVADYKYD     |
| xlPPARG     | DILDEKTEFLC | RNDQ        | -----       | -----      | SPIDYKYD     |
| olPPARG     | -----       | SS          | LSPP        | -----      | LVSSMSSTGM   |
| salsPPARG   | PHHHHSP     | DRSHSCNHSP  | DRSHS       | -----      | FNHSP        |
| omPPARG     | DRSQSFNHSP  | DRNHSINHSP  | DRSYSYNHRS  | DRSHSFNHSP | DRSHSFNHSP   |
| Consistency | 0000000000  | 8660000065  | 7587000000  | 0000000000 | 0065777777   |



```
..... 160. .... 170. .... 180. .... 190. .... 200
mmPPARGi1 LKLQ EY-----QSAIKVE PASPPYYSEK
rnPPARGi2 LKLQ EY-----QSAIKVE PASPPYYSEK
macfPPARG LKLQ EY-----QSAIKVE PASPPYYSEK
ggPPARG IKLQDC-----QSAIKME PPSPPYFSEK
ocPPARG LKLQ EY-----QSAIKVE PASPPYYSEK
mmPPARGi2 LKLQ EY-----QSAIKVE PASPPYYSEK
rnPPARGi1 LKLQ EY-----QSAIKVE PASPPYYSEK
btPPARGi2 LKLQ EY-----QSAIKVE PVSPPYYSEK
clPPARG LKLQ EY-----QSAIKVE PASPPYYSEK
ssPPARG LKLQDY-----QSAIKVE PVSPPYYSEK
hsPPARGi2 LKLQ EY-----QSAIKVE PASPPYYSEK
macmPPARG LKLQ EY-----QSAIKVE PASPPYYSEK
drPPARG YRTQENYRTH EPIYRPEHSS YSPEENTYRA QQI QNSIKLE PESPPQFAEN
hsPPARGi1 LKLQ EY-----QSAIKVE PASPPYYSEK
btPPARGi1 LKLQ EY-----QSAIKVE PVSPPYYSEK
xlPPARG LKLQEC-----QSSIKLE PPSPPYFSDK
olPPARG AYDPSS PQSE DHLTNMDY--TNLHSYRTE LDT HSSVKLE PDSPPQYSDS
salsPPARG DRNHSFNHSP DRSHSFNHSP DRSHSYNDTY SVY QGSVNDK PLSPSQSSDC
omPPARG DRSSQSFNHSP DRNHSFNHSP DRSHSYNHRS DRSHSFNHSP DRSHSFNHSP
Consistency 6868760000 0000000000 0000000000 0008878878 95*9877887
```

```
..... 210. .... 220. .... 230. .... 240. .... 250
mmPPARGi1 TQLYNRP-----HEEPSNSLM AIECRVCGDK
rnPPARGi2 TQLYNRP-----HEEPSNSLM AIECRVCGDK
macfPPARG TQLYNKP-----HEEPSNSLM AIECRVCGDK
ggPPARG VQLYNKP-----HEEPSNSLM AIECRVCGDK
ocPPARG TQLYNKT-----HEEPSNSLM AIECRVCGDK
mmPPARGi2 TQLYNRP-----HEEPSNSLM AIECRVCGDK
rnPPARGi1 TQLYNRP-----HEEPSNSLM AIECRVCGDK
btPPARGi2 TQLYSKP-----HEEPSNSLM AIECRVCGDK
clPPARG TQLYNKP-----HEEPSNSLM AIECRVCGDK
ssPPARG TQLYNKP-----HEEPSNSLM AIECRVCGDK
hsPPARGi2 TQLYNKP-----HEEPSNSLM AIECRVCGDK
macmPPARG TQLYNKP-----HEEPSNSLM AIECRVCGDK
drPPARG SVSFSKT-----PEDPSSSSL NIECRVCGDK
hsPPARGi1 TQLYNKP-----HEEPSNSLM AIECRVCGDK
btPPARGi1 TQLYSKP-----HEEPSNSLM AIECRVCGDK
xlPPARG PQCSKA-----FEDTPNSFI AIECRVCGDK
olPPARG PVFSKLP-----EDTPSSSL NIECRVCGDK
salsPPARG SIVSLSR FRP HSNP-----FTYTDASSLL NIDCRVCGDK
omPPARG DRSHSFNHSP DRSHSFNHSP DKSHSYNYTY SGNQNASPL NIDCRVCGDK
Consistency 6776766000 0000000000 0000000000 0688678*78 7*9*****
```

```
..... 260. .... 270. .... 280. .... 290. .... 300
mmPPARGi1 ASGFHYGVHA CEGCKGFFRR TIRLKL IYDR CDLNCRIHKK SRNKCQYCRF
rnPPARGi2 ASGFHYGVHA CEGCKGFFRR TIRLKL IYDR CDLNCRIHKK SRNKCQYCRF
macfPPARG ASGFHYGVHA CEGCKGFFRR TIRLKL IYDR CDLNCRIHKK SRNKCQYCRF
ggPPARG ASGFHYGVHA CEGCKGFFRR TIRLKL IYDR CDLNCRIHKK SRNKCQYCRF
ocPPARG ASGFHYGVHA CEGCKGFFRR TIRLKL IYDR CDLNCRIHKK SRNKCQYCRF
mmPPARGi2 ASGFHYGVHA CEGCKGFFRR TIRLKL IYDR CDLNCRIHKK SRNKCQYCRF
rnPPARGi1 ASGFHYGVHA CEGCKGFFRR TIRLKL IYDR CDLNCRIHKK SRNKCQYCRF
btPPARGi2 ASGFHYGVHA CEGCKGFFRR TIRLKL IYDR CDLNCRIHKK SRNKCQYCRF
clPPARG ASGFHYGVHA CEGCKGFFRR TIRLKL IYDR CDLNCRIHKK SRNKCQYCRF
ssPPARG ASGFHYGVHA CEGCKGFFRR TIRLKL IYDR CDLNCRIHKK SRNKCQYCRF
hsPPARGi2 ASGFHYGVHA CEGCKGFFRR TIRLKL IYDR CDLNCRIHKK SRNKCQYCRF
macmPPARG ASGFHYGVHA CEGCKGFFRR TIRLKL IYDR CDLNCRIHKK SRNKCQYCRF
drPPARG ASGFHYGVHA CEGCKGFFRR TIRLKL VYDH CDLHCR IHKK SRNKCQYCRF
hsPPARGi1 ASGFHYGVHA CEGCKGFFRR TIRLKL IYDR CDLNCRIHKK SRNKCQYCRF
btPPARGi1 ASGFHYGVHA CEGCKGFFRR TIRLKL IYDR CDLNCRIHKK SRNKCQYCRF
xlPPARG ASGFHYGVHA CEGCKGFFRR TIRLKL IYER CDLNCRIHKK SRNKCQFCRF
olPPARG ASGFHYGVHA CEGCKGFFRR TIRLKL VYDH CDLHCR IHKK SRNKCQYCRF
salsPPARG ASGFHYGVHV CEGCKGFFRR TVRLKL VYDH CDLHCR IHKK SRNKCQYCRF
omPPARG ASGFHYGVHA CEGCKGFFRR TVRLKL VYDH CELHCR IHKK SRNKCQYCRF
Consistency *****9 *****9 99*****9*97 *9*8***** *****9***
```

```
..... 310. .... 320. .... 330. .... 340. .... 350
mmPPARGi1 QKCLAVGMSH NAIRFGRMPQ AEKEKLLAEI SSDIDQLNPE SADLRALAKH
rnPPARGi2 QKCLAVGMSH NAIRFGRMPQ AEKEKLLAEI SSDIDQLNPE SADLRALAKH
macfPPARG QKCLAVGMSH NAIRFGRMPQ AEKEKLLAEI SSDIDQLNPE SADLRALAKH
ggPPARG QKCLAVGMSH NAIRFGRMPQ AEKEKLLAEI SSDIDQLNPE SADLRALAKH
ocPPARG QKCLAVGMSH NAIRFGRMPG AEKEKLLAEI SSDIDQLNPE SADLRALAKH
mmPPARGi2 QKCLAVGMSH NAIRFGRMPQ AEKEKLLAEI SSDIDQLNPE SADLRALAKH
rnPPARGi1 QKCLAVGMSH NAIRFGRMPQ AEKEKLLAEI SSDIDQLNPE SADLRALAKH
btPPARGi2 QKCLAVGMSH NAIRFGRMPQ AEKEKLLAEI SSDIDQLNPE SADLRALAKH
clPPARG QKCLAVGMSH NAIRFGRMPQ AEKEKLLAEI SSDIDQLNPE SADLRALAKH
ssPPARG QKCLAVGMSH NAIRFGRMPQ AEKEKLLAEI SSDIDQLNPE SADLRALAKH
hsPPARGi2 QKCLAVGMSH NAIRFGRMPQ AEKEKLLAEI SSDIDQLNPE SADLRALAKH
macmPPARG QKCLAVGMSH NAIRFGRMPQ AEKEKLLAEI SSDIDQLNPE SADLRALAKH
drPPARG QKCLMVGMSH NAIRFGRMPQ AEKEKLLAEF SSDVNHMHP E SADLRALARH
hsPPARGi1 QKCLAVGMSH NAIRFGRMPQ AEKEKLLAEI SSDIDQLNPE SADLRALAKH
btPPARGi1 QKCLAVGMSH NAIRFGRMPQ AEKEKLLAEI SSDIDQLNPE SADLRALAKH
xlPPARG QKCLAVGMSH NAIRFGRMPQ AEKEKLLAEI SSDIDQLNPE SADQRLAKH
olPPARG QKCLNVGMSH NAIRFGRMPQ AEKEKLLAEF SSDMEHMHP E AADLRALARH
salsPPARG QKCLLVGMSH DAIRFGRMPQ VEREKLLQAE FMDVEPRNPE SADLRALSRQ
omPPARG QKCLLVGMSH DAIRFGRMPQ VEREKLLQAEF MDVDPNPE SAE LRALSRQ
Consistency ***7***** 9*****9 9*9***9997 8889878** 9*99*9*988
```

|             | 360        | 370        | 380        | 390        | 400         |
|-------------|------------|------------|------------|------------|-------------|
| mmPPARGi1   | LYDSYIKSFP | LTKAKARAIL | TGKTDDKSPF | VIYDMNSLMM | GEDKIKFKHI  |
| rnPPARGi2   | LYDSYIKSFP | LTKAKARAIL | TGKTDDKSPF | VIYDMNSLMM | GEDKIKFKHI  |
| macfPPARG   | LYDSYIKSFP | LTKAKARAIL | TGKTDDKSPF | VIYDMNSLMM | GEDKIKFKHI  |
| ggPPARG     | LYDSYIKSFP | LTKAKARAIL | TGKTDDKSPF | VIYDMNSLRM | GEDQIKCKHA  |
| ocPPARG     | LYDSYIKSFP | LTKAKARAIL | TGKTDDKSPF | VIYDMNSLMM | GEDKIKFKHI  |
| mmPPARGi2   | LYDSYIKSFP | LTKAKARAIL | TGKTDDKSPF | VIYDMNSLMM | GEDKIKFKHI  |
| rnPPARGi1   | LYDSYIKSFP | LTKAKARAIL | TGKTDDKSPF | VIYDMNSLMM | GEDKIKFKHI  |
| btPPARGi2   | LYDSYIKSFP | LTKAKARAIL | TGKTDDKSPF | VIYDMNSLMM | GEDKIKFKHI  |
| clPPARG     | LYDSYIKSFP | LTKAKARAIL | TGKTDDKSPF | VIYDMNSLMM | GEDKIKFKHI  |
| ssPPARG     | LYDSYIKSFP | LTKAKARAIL | TGKTDDKSPF | VIYDMNSLMM | GEDKIKFKHI  |
| hsPPARGi2   | LYDSYIKSFP | LTKAKARAIL | TGKTDDKSPF | VIYDMNSLMM | GEDKIKFKHI  |
| macmPPARG   | LYDSYIKSFP | LTKAKARAIL | TGKTDDKSPF | VIYDMNSLMM | GEDKIKFKHI  |
| drPPARG     | LYESYLKYFP | LTKAKARAIL | SGKTSNAPF  | VIHDMKSLVE | GEQM INCRYM |
| hsPPARGi1   | LYDSYIKSFP | LTKAKARAIL | TGKTDDKSPF | VIYDMNSLMM | GEDKIKFKHI  |
| btPPARGi1   | LYDSYIKSFP | LTKAKARAIL | TGKTDDKSPF | VIYDMNSLMM | GEDKIKFKHI  |
| xlPPARG     | LYDSYVKSFP | LTKAKARAIL | TGRATDKTPV | VIHDMNSLMM | GEDQIKGQCV  |
| olPPARG     | LYEAYLKYFP | LTKAKARAIL | SGKSGDNVFP | VIHDIKSLME | GKQLINNGQT  |
| salsPPARG   | LCLSYHRHFP | LTKSKAKAIL | SGKTHGNSPF | VIHDMKSLTA | GQYFINCRQL  |
| omPPARG     | LCLSYHRHFP | LTKSKAKAIL | SGKTHGNSPF | VIHDMKSLTA | GQYFINCRQL  |
| Consistency | *879*797** | ***9**9*** | 8*997878*9 | **8*97**77 | *876*75777  |

|             | 410        | 420        | 430        | 440        | 450        |
|-------------|------------|------------|------------|------------|------------|
| mmPPARGi1   | -----      | -----      | -----      | ---TPLQEQS | KEVAIRIFQG |
| rnPPARGi2   | -----      | -----      | -----      | ---TPLQEQS | KEVAIRIFQG |
| macfPPARG   | -----      | -----      | -----      | ---TPLQEQS | KEVAIRIFQG |
| ggPPARG     | -----      | -----      | -----      | ---SPLQEQN | KEVAIRIFQR |
| ocPPARG     | -----      | -----      | -----      | ---TPLQEQS | KEVAIRIFQG |
| mmPPARGi2   | -----      | -----      | -----      | ---TPLQEQS | KEVAIRIFQG |
| rnPPARGi1   | -----      | -----      | -----      | ---TPLQEQS | KEVAIRIFQG |
| btPPARGi2   | -----      | -----      | -----      | ---SPLQEFS | KEVAIRIFQG |
| clPPARG     | -----      | -----      | -----      | ---TPLQEQS | KEVAIRIFQG |
| ssPPARG     | -----      | -----      | -----      | ---TPLQEQS | KEVAIRIFQG |
| hsPPARGi2   | -----      | -----      | -----      | ---TPLQEQS | KEVAIRIFQG |
| macmPPARG   | -----      | -----      | -----      | ---TPLQEQS | KEVAIRIFQG |
| drPPARG     | PLHEHR     | -----      | -----      | ---RSDLGIM | HEVELRFFHS |
| hsPPARGi1   | -----      | -----      | -----      | ---TPLQEQS | KEVAIRIFQG |
| btPPARGi1   | -----      | -----      | -----      | ---SPLQEFS | KEVAIRIFQG |
| xlPPARG     | -----      | -----      | -----      | ---TPEQN   | KEVAIRIFQR |
| olPPARG     | SFQEQQIATA | GHGVSGIAGA | LSGPDCNVFG | MASNIGSEPP | DGVELRFFYS |
| salsPPARG   | PVLERQRSV  | -----      | -----      | ---LPPEEPA | EELLSVFRR  |
| omPPARG     | PVLERQRSV  | -----      | -----      | ---LPPEEPA | EELLSVFRR  |
| Consistency | 0000000000 | 0000000000 | 0000000000 | 0005757967 | 7997988*76 |

|             | 460        | 470        | 480        | 490        | 500        |
|-------------|------------|------------|------------|------------|------------|
| mmPPARGi1   | CQFRSVEAVQ | EITEYAKNIP | GFINLDLNDQ | VTLLKYGVHE | IIYTMLASLM |
| rnPPARGi2   | CQFRSVEAVQ | EITEYAKNIP | GFINLDLNDQ | VTLLKYGVHE | IIYTMLASLM |
| macfPPARG   | CQFRSVEAVQ | EITEYAKSIP | GFVNLDLNDQ | VTLLKYGVHE | IIYTMLASLM |
| ggPPARG     | CQFRSVEAVQ | EITEFAKNIP | GFVNLDLNDQ | VTLLKYGVHE | IIYTMLASLM |
| ocPPARG     | CQFRSVEAVQ | EITEYAKNIP | GFVSLDLNDQ | VTLLKYGVHE | IIYTMLASLM |
| mmPPARGi2   | CQFRSVEAVQ | EITEYAKNIP | GFINLDLNDQ | VTLLKYGVHE | IIYTMLASLM |
| rnPPARGi1   | CQFRSVEAVQ | EITEYAKNIP | GFINLDLNDQ | VTLLKYGVHE | IIYTMLASLM |
| btPPARGi2   | CQFRSVEAVQ | EITEYAKNIP | GFVNLDLNDQ | VTLLKYGVHE | IIYTMLASLM |
| clPPARG     | CQFRSVEAVQ | EITEYAKSIP | GFVNLDLNDQ | VTLLKYGVHE | IIYTMLASLM |
| ssPPARG     | CQFRSVEAVQ | EITEYAKNIP | GFVNLDLNDQ | VTLLKYGVHE | IIYTMLASLM |
| hsPPARGi2   | CQFRSVEAVQ | EITEYAKSIP | GFVNLDLNDQ | VTLLKYGVHE | IIYTMLASLM |
| macmPPARG   | CQFRSVEAVQ | EITEYAKSIP | GFVNLDLNDQ | VTLLKYGVHE | IIYTMLASLM |
| drPPARG     | YQSRSAEAI  | EVTEFAKSIP | GFINLDLNDQ | VTLLKYGVIE | VMIIMISPLM |
| hsPPARGi1   | CQFRSVEAVQ | EITEYAKSIP | GFVNLDLNDQ | VTLLKYGVHE | IIYTMLASLM |
| btPPARGi1   | CQFRSVEAVQ | EITEYAKNIP | GFVNLDLNDQ | VTLLKYGVHE | IIYTMLASLM |
| xlPPARG     | CQSRSAEAVR | EITEFAKNIP | GFVSLDLNDQ | VTLLKYGVHE | IIYTMLASLM |
| olPPARG     | CQSRSAEAVR | EVTEFAKSIP | GFVNLDLNDQ | VTLLKYGVIE | VLIIMMSPLM |
| salsPPARG   | IQFRSAEAVQ | EVTEFTKSIP | GFTELDMNDQ | VILLKYGVIE | VMTTMLAPLM |
| omPPARG     | IQFRSAEAVQ | EVTEFAKSIP | GFTELDMNDQ | VILLKYGVIE | VMTTMLAPLM |
| Consistency | 7*7**7**98 | *9**89*7** | **88**9*** | *8*****6*  | 98689997** |

|             |         |      |       |        |       |       |       |       |        |       |       |       |      |   |
|-------------|---------|------|-------|--------|-------|-------|-------|-------|--------|-------|-------|-------|------|---|
|             | .....   | 510. | ..... | 520.   | ..... | 530.  | ..... | 540.  | .....  | 550   |       |       |      |   |
| mmPPARGi1   | NKDGVLI | SEG  | QG    | FMTREF | LK    | SLRKP | F     | GDFM  | EPKFE  | FAVKF | NALEL | DDSD  | L    |   |
| rnPPARGi2   | NKDGVLI | SEG  | QG    | FMTREF | LK    | SLRKP | F     | GDFM  | EPKFE  | FAVKF | NALEL | DDSD  | L    |   |
| macfPPARG   | NKDGVI  | ISEG | QG    | FMTREF | LK    | SLRKP | F     | GDFM  | EPKFE  | FAVKF | NALEL | DDSD  | L    |   |
| ggPPARG     | NKDGVLI | SDG  | QG    | FMTREF | LK    | SLRKP | F     | CDFM  | EPKFE  | FAVKF | NALEL | DDSD  | L    |   |
| ocPPARG     | NKDGVLI | ISEG | QG    | FMTREF | LK    | SLRKP | F     | GDFM  | EPKFE  | FAVKF | NALEL | DDSD  | L    |   |
| mmPPARGi2   | NKDGVLI | ISEG | QG    | FMTREF | LK    | SLRKP | F     | GDFM  | EPKFE  | FAVKF | NALEL | DDSD  | L    |   |
| rnPPARGi1   | NKDGVLI | ISEG | QG    | FMTREF | LK    | SLRKP | F     | GDFM  | EPKFE  | FAVKF | NALEL | DDSD  | L    |   |
| btPPARGi2   | NKDGVLI | ISEG | QG    | FMTREF | LK    | SLRKP | F     | GDFM  | EPKFE  | FAVKF | NALEL | DDSD  | L    |   |
| clPPARG     | NKDGVI  | ISEG | QG    | FMTREF | LK    | SLRKP | F     | GDFM  | EPKFE  | FAVKF | NALEL | DDSD  | L    |   |
| ssPPARG     | NKDGVI  | ISEG | QG    | FMTREF | LK    | SLRKP | F     | GDFM  | EPKFE  | FAVKF | NALEL | DDSD  | L    |   |
| hsPPARGi2   | NKDGVI  | ISEG | QG    | FMTREF | LK    | SLRKP | F     | GDFM  | EPKFE  | FAVKF | NALEL | DDSD  | L    |   |
| macmPPARG   | NKDGVI  | ISEG | QG    | FMTREF | LK    | SLRKP | F     | GDFM  | EPKFE  | FAVKF | NALEL | DDSD  | L    |   |
| drPPARG     | NKDGTL  | ISYG | QI    | FMTREF | LK    | SLRKP | F     | CEMM  | EPKFE  | FSIKF | NMLEL | DDCD  | M    |   |
| hsPPARGi1   | NKDGVI  | ISEG | QG    | FMTREF | LK    | SLRKP | F     | GDFM  | EPKFE  | FAVKF | NALEL | DDSD  | L    |   |
| btPPARGi1   | NKDGVI  | ISEG | QG    | FMTREF | LK    | SLRKP | F     | GDFM  | EPKFE  | FAVKF | NALEL | DDSD  | L    |   |
| xlPPARG     | NKDGVL  | VAEG | QG    | FMTREF | LK    | SLRKP | F     | SDFM  | EPKFE  | FAIRF | NSLEL | DDSD  | L    |   |
| olPPARG     | NKDGTL  | ISYG | QI    | FMTREF | LK    | SLRKP | F     | CQML  | EPKF   | DFS   | SVKF  | NTLEL | DDSD | M |
| salsPPARG   | NKDGTL  | FAYG | QI    | FMTREF | LK    | SLRKP | F     | CEMM  | EPKFE  | FAAKF | NLLEL | DDSD  | M    |   |
| omPPARG     | NKDGTL  | FAYG | QI    | FMTREF | LK    | SLRKP | F     | CEMM  | EPKFE  | FAVKF | NVLEL | DDSD  | M    |   |
| Consistency | ***8    | 9886 | *     | *6     | ***** | ***** | 5879  | ***** | 9*999* | *7    | ***** | 9*8   |      |   |

|             |         |       |       |       |       |       |       |       |       |       |       |  |
|-------------|---------|-------|-------|-------|-------|-------|-------|-------|-------|-------|-------|--|
|             | .....   | 560.  | ..... | 570.  | ..... | 580.  | ..... | 590.  | ..... | 600   |       |  |
| mmPPARGi1   | AIFIAVI | IILS  | GDRP  | GLLNV | K     | PIEDI | QDNLL | QALEL | QLKLN | HPESS | QLFAK |  |
| rnPPARGi2   | AIFIAVI | IILS  | GDRP  | GLLNV | K     | PIEDI | QDNLL | QALEL | QLKLN | HPESS | QLFAK |  |
| macfPPARG   | AIFIAVI | IILS  | GDRP  | GLLNV | K     | PIEDI | QDNLL | QALEL | QLKLN | HPESS | QLFAK |  |
| ggPPARG     | AIFIAVI | IILS  | GDRP  | GLLNV | K     | PIEDI | QDNLL | QALEL | QLKLN | HPESS | QLFAK |  |
| ocPPARG     | AIFIAVI | IILS  | GDRP  | GLLNV | K     | PIEDI | QDNLL | QALEL | QLKLN | HPEAS | QLFAK |  |
| mmPPARGi2   | AIFIAVI | IILS  | GDRP  | GLLNV | K     | PIEDI | QDNLL | QALEL | QLKLN | HPESS | QLFAK |  |
| rnPPARGi1   | AIFIAVI | IILS  | GDRP  | GLLNV | K     | PIEDI | QDNLL | QALEL | QLKLN | HPESS | QLFAK |  |
| btPPARGi2   | AIFIAVI | IILS  | GDRP  | GLLNV | K     | PIEDI | QDNLL | QALEL | QLKLN | HPESS | QLFAK |  |
| clPPARG     | AIFIAVI | IILS  | GDRP  | GLLNV | K     | PIEDI | QDNLL | QALEL | QLKLN | HPESS | QLFAK |  |
| ssPPARG     | AIFIAVI | IILS  | GDRP  | GLLNV | K     | PIEDI | QDNLL | QALEL | QLKLN | HPESS | QLFAK |  |
| hsPPARGi2   | AIFIAVI | IILS  | GDRP  | GLLNV | K     | PIEDI | QDNLL | QALEL | QLKLN | HPESS | QLFAK |  |
| macmPPARG   | AIFIAVI | IILS  | GDRP  | GLLNV | K     | PIEDI | QDNLL | QALEL | QLKLN | HPESS | QLFAK |  |
| drPPARG     | ALFLAVI | IILS  | GDRP  | GLLDV | K     | PIEDL | QETVL | HSLEL | QLKIN | HPDSL | QLFAK |  |
| hsPPARGi1   | AIFIAVI | IILS  | GDRP  | GLLNV | K     | PIEDI | QDNLL | QALEL | QLKLN | HPESS | QLFAK |  |
| btPPARGi1   | AIFIAVI | IILS  | GDRP  | GLLNV | K     | PIEDI | QDNLL | QALEL | QLKLN | HPESS | QLFAK |  |
| xlPPARG     | AIFVAVI | IILS  | GDRP  | GLLNV | K     | PIEDI | QDSL  | QALEL | QLKLN | HPDSA | QLFAK |  |
| olPPARG     | ALFLAVI | IILS  | GDRP  | GLLNV | K     | PIEQL | QETVL | HSLEL | HLKIN | HPDSL | QLFAK |  |
| salsPPARG   | ALFFAVI | IILS  | GDRP  | GLVNV | K     | PIEDL | QETVL | QALEL | QLKTI | HPDCP | QLFAK |  |
| omPPARG     | ALFFAVI | IILS  | GDRP  | GLVNV | K     | PIEDL | QETVL | QALEL | QLKTI | HPDCP | QLFAK |  |
| Consistency | *9*8    | ***** | ***** | 99**  | ***99 | *878* | 89*** | 9**88 | **886 | ***** |       |  |

|             |         |      |       |       |        |       |       |       |     |
|-------------|---------|------|-------|-------|--------|-------|-------|-------|-----|
|             | .....   | 610. | ..... | 620.  | .....  | 630.  | ..... | 640.  | ... |
| mmPPARGi1   | VLQKMTD | DLRQ | IVTEH | VQLLH | VIKKT  | ETDMS | LHPLL | QEIIK | DLY |
| rnPPARGi2   | VLQKMTD | DLRQ | IVTEH | VQLLH | VIKKT  | ETDMS | LHPLL | QEIIK | DLY |
| macfPPARG   | LLQKMTD | DLRQ | IVTEH | VQLLQ | VIKKT  | ETDMS | LHPLL | QEIIK | DLY |
| ggPPARG     | LLQKMTD | DLRQ | IVTEH | VQLLQ | VIKKT  | ETDMS | LHPLL | QEIIK | DLY |
| ocPPARG     | LLQKMTD | DLRQ | IVTEH | VQLLQ | VIKKT  | ETDMS | LHPLL | QEIIK | DLY |
| mmPPARGi2   | VLQKMTD | DLRQ | IVTEH | VQLLH | VIKKT  | ETDMS | LHPLL | QEIIK | DLY |
| rnPPARGi1   | VLQKMTD | DLRQ | IVTEH | VQLLH | VIKKT  | ETDMS | LHPLL | QEIIK | DLY |
| btPPARGi2   | LLQKMTD | DLRQ | IVTEH | VQLLQ | VIKKT  | ETDMS | LHPLL | QEIIK | DLY |
| clPPARG     | LLQKMTD | DLRQ | IVTEH | VQLLQ | VIKKT  | ETDMS | LHPLL | QEIIK | DLY |
| ssPPARG     | LLQKMTD | DLRQ | IVTEH | VQLLQ | VIKKT  | ETDMS | LHPLL | QEIIK | DLY |
| hsPPARGi2   | LLQKMTD | DLRQ | IVTEH | VQLLQ | VIKKT  | ETDMS | LHPLL | QEIIK | DLY |
| macmPPARG   | LLQKMTD | DLRQ | IVTEH | VQLLQ | VIKKT  | ETDMS | LHPLL | QEIIK | DLY |
| drPPARG     | VLQKMTD | DLRQ | LVTDH | VQLIQ | MMKETE | ADWS  | LHPLL | QEIMR | DLY |
| hsPPARGi1   | LLQKMTD | DLRQ | IVTEH | VQLLQ | VIKKT  | ETDMS | LHPLL | QEIIK | DLY |
| btPPARGi1   | LLQKMTD | DLRQ | IVTEH | VQLLQ | VIKKT  | ETDMS | LHPLL | QEIIK | DLY |
| xlPPARG     | LLQKMTD | DLRQ | VVTEH | VQLLQ | LIKKTE | ADMC  | LHPLL | QEIIK | DLY |
| olPPARG     | VLQKMTD | DLRQ | MVTDH | VQLIQ | LLKKTE | VDMF  | LHPLL | QEIMK | DLY |
| salsPPARG   | LLQKMTD | DLRQ | LVANH | VRLIH | LLKKQE | ELQMC | LHPLL | QEIMR | DLY |
| omPPARG     | LLQKMTD | DLRQ | LVANH | VRLIH | LLKKQE | ELVC  | LHPLL | QEIMR | DLY |
| Consistency | 8*****  |      | 8*88  | *9997 | 88*98  | *7987 | ***** | *79   | *** |

Supplemental data 3A: Synteny of zebrafish genomic regions of Pparaa and Pparab to human genomic region of PPARA

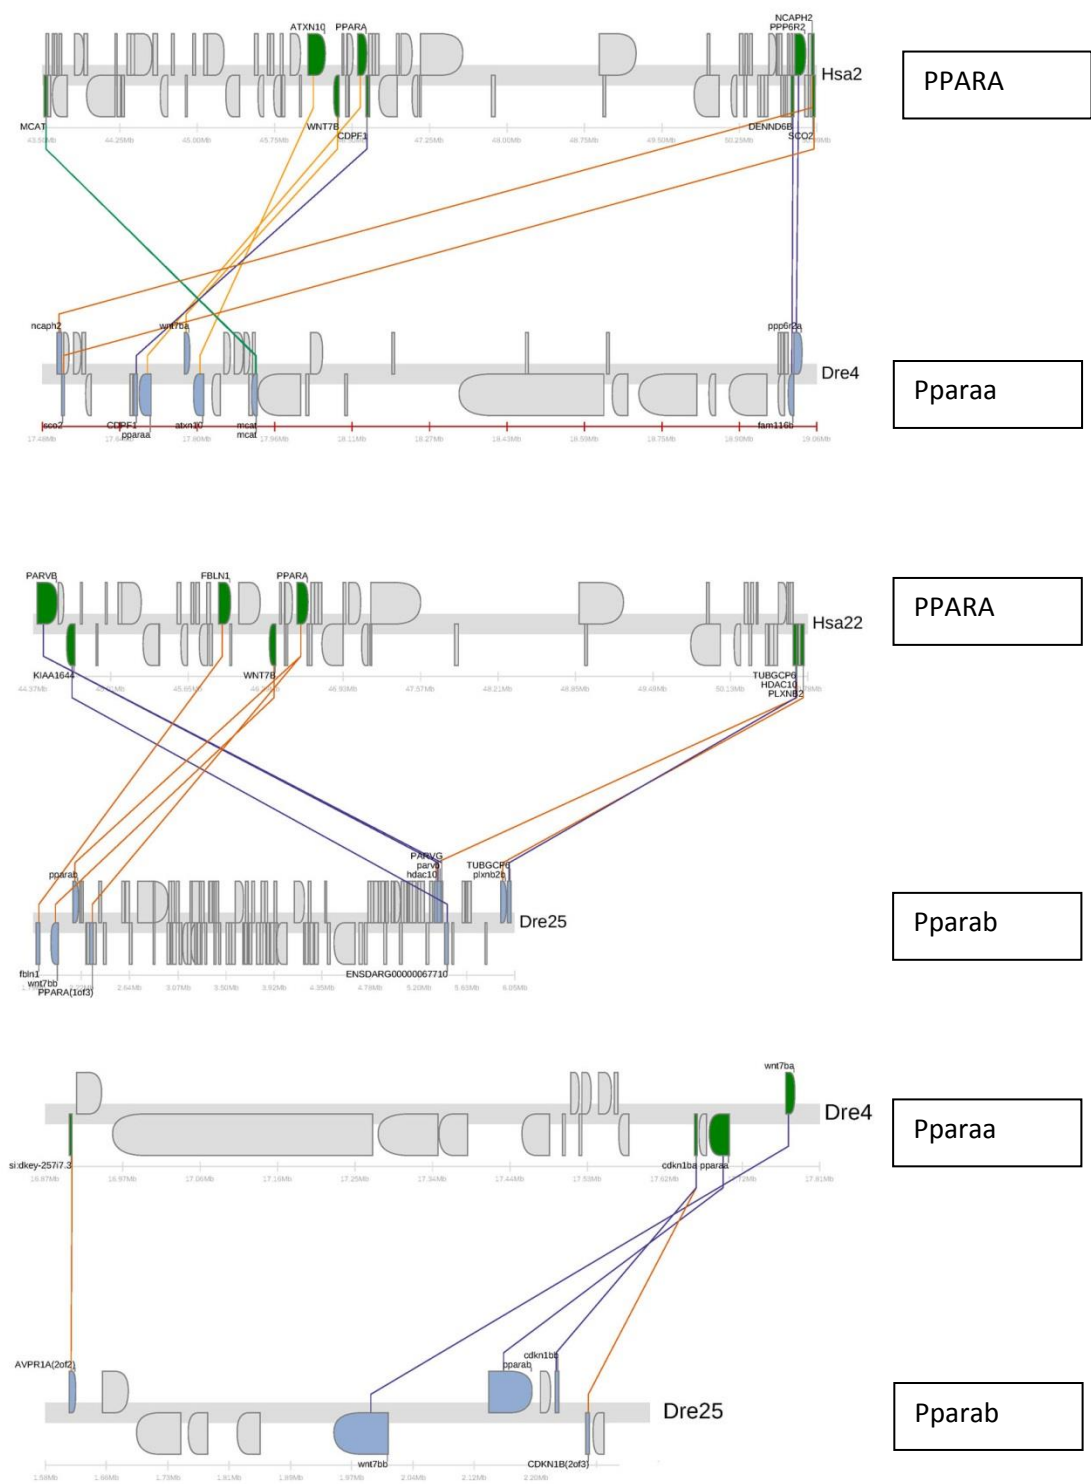

Supplemental data 3B: Synteny of zebrafish genomic regions of Pparda and Ppardb to human genomic region of PPARD

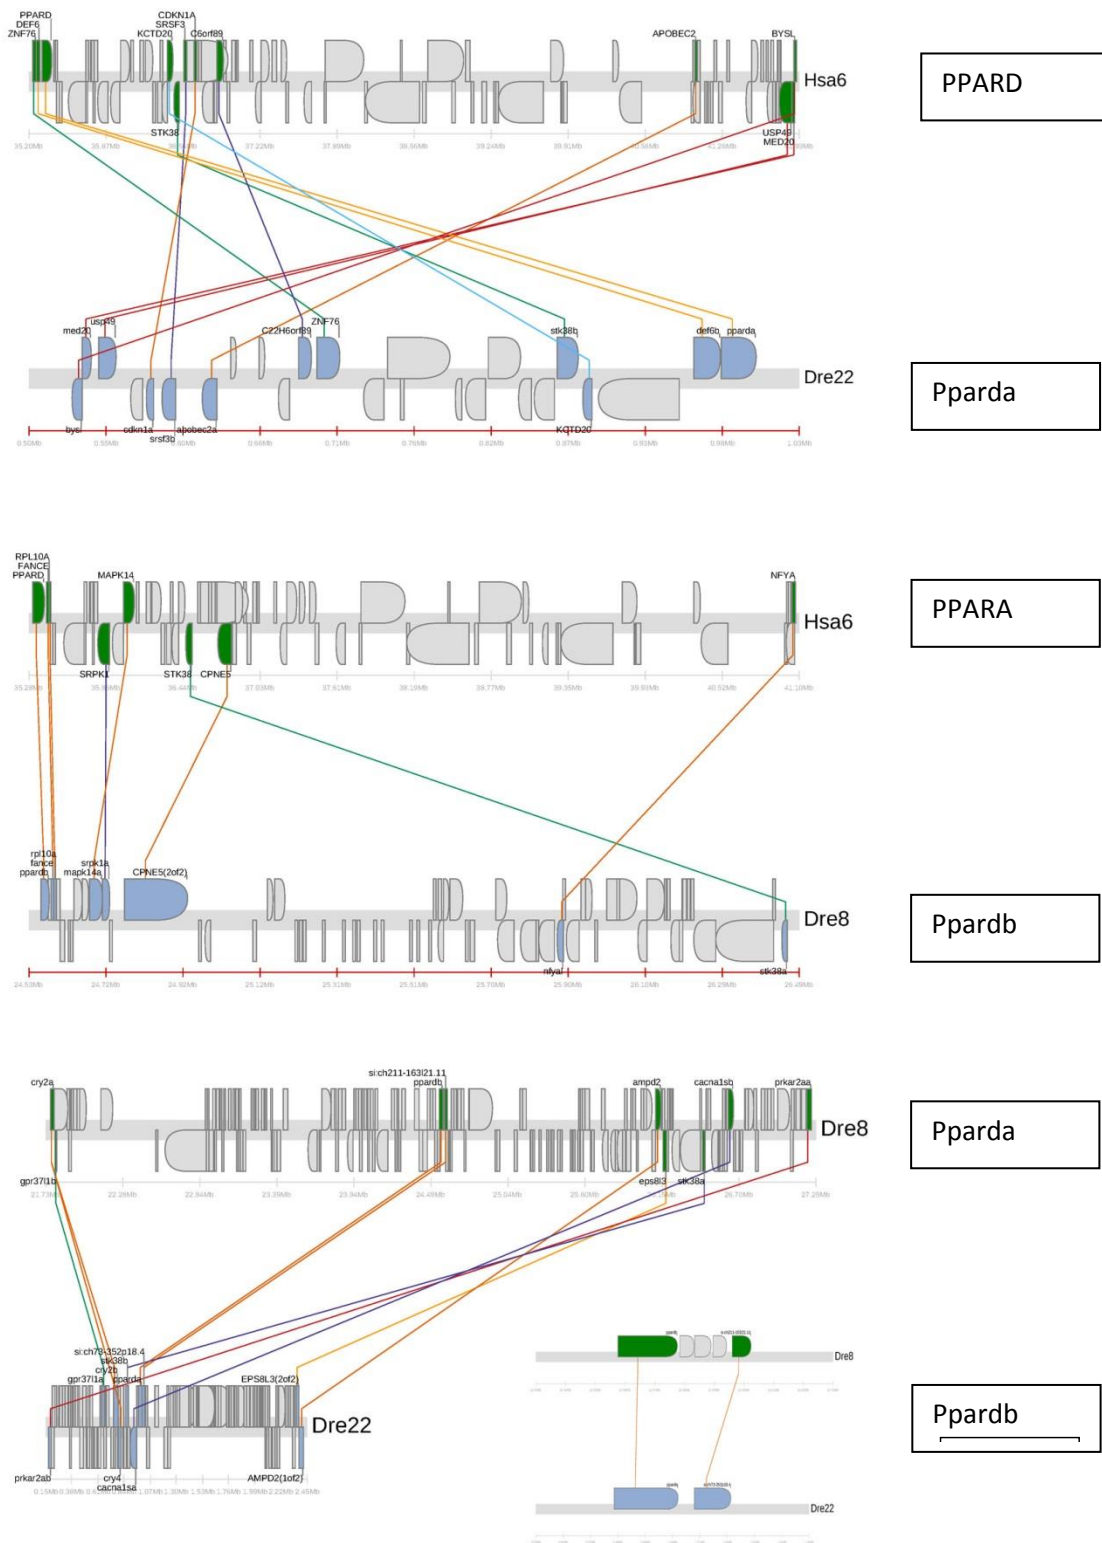



Supplemental data 3C: Synteny of zebrafish genomic regions of Pparg to human genomic region of PPARG

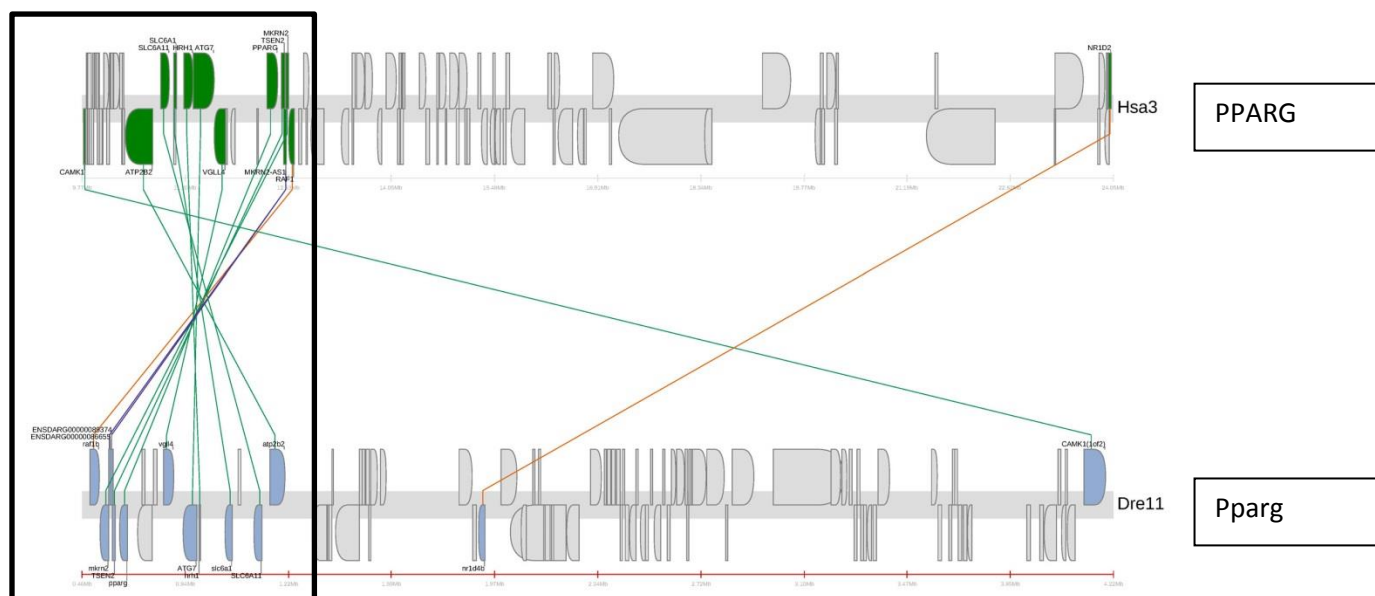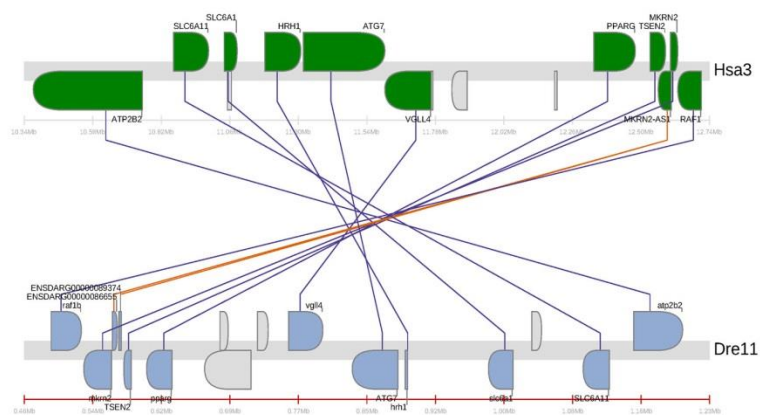

Zoom in at indicated region
